# Supplementary material for: Delineating the impact of machine learning elements in pre-microRNA detection
Source: PeerJ. 2017 Mar 29;5:e3131. doi: 10.7717/peerj.3131 (PMC5374968; doi:10.7717/peerj.3131)
Supplement: File S3 — The recorded model performances for 10-fold cross validation (720). [file peerj-05-3131-s003.xlsx]

## Sheet: default
TruePositives	FalsePositives	TrueNegatives	FalseNegatives	Recall	Precision	Sensitivity	Specifity	F-measure	Accuracy	Cohen's kappa	Iteration	negative	Features	positiveData	Learner
41	0	41	0	1	1	1	1	1	1	1	0	RowShuf	SlowFS	RPMabove100	RF
45	0	45	0	1	1	1	1	1	1	1	1	RowShuf	SlowFS	RPMabove100	RF
43	0	43	0	1	1	1	1	1	1	1	2	RowShuf	SlowFS	RPMabove100	RF
41	0	41	0	1	1	1	1	1	1	1	3	RowShuf	SlowFS	RPMabove100	RF
45	0	45	0	1	1	1	1	1	1	1	4	RowShuf	SlowFS	RPMabove100	RF
50	0	50	0	1	1	1	1	1	1	1	5	RowShuf	SlowFS	RPMabove100	RF
40	0	40	0	1	1	1	1	1	1	1	6	RowShuf	SlowFS	RPMabove100	RF
48	0	48	0	1	1	1	1	1	1	1	7	RowShuf	SlowFS	RPMabove100	RF
41	0	41	0	1	1	1	1	1	1	1	8	RowShuf	SlowFS	RPMabove100	RF
44	0	44	0	1	1	1	1	1	1	1	9	RowShuf	SlowFS	RPMabove100	RF
40	5	40	5	1	1	1	1	0.941176	0.934211	0.867133	0	ColShuf	SlowFS	RPMabove100	RF
38	2	38	2	0.95	0.95	0.95	0.95	0.95	0.947368	0.894444	1	ColShuf	SlowFS	RPMabove100	RF
35	6	35	6	0.972222	0.971429	0.972222	0.972222	0.909091	0.907895	0.816552	2	ColShuf	SlowFS	RPMabove100	RF
40	2	40	2	0.97561	0.970588	0.97561	0.97561	0.963855	0.960526	0.920391	3	ColShuf	SlowFS	RPMabove100	RF
41	4	41	4	0.953488	0.935484	0.953488	0.953488	0.931818	0.921053	0.838183	4	ColShuf	SlowFS	RPMabove100	RF
47	4	47	4	1	1	1	1	0.959184	0.947368	0.885456	5	ColShuf	SlowFS	RPMabove100	RF
41	5	41	5	0.933333	0.953488	0.933333	0.933333	0.921348	0.907895	0.810541	6	ColShuf	SlowFS	RPMabove100	RF
42	5	42	5	1	1	1	1	0.94382	0.934211	0.865057	7	ColShuf	SlowFS	RPMabove100	RF
40	3	40	3	0.969697	0.97561	0.969697	0.969697	0.952381	0.947368	0.893632	8	ColShuf	SlowFS	RPMabove100	RF
38	7	38	7	1	1	1	1	0.915663	0.907895	0.815789	9	ColShuf	SlowFS	RPMabove100	RF
36	8	36	8	1	1	1	1	0.9	0.894737	0.791209	0	pseudo	SlowFS	RPMabove100	RF
37	3	37	3	0.925	0.925	0.925	0.925	0.925	0.921053	0.841667	1	pseudo	SlowFS	RPMabove100	RF
37	3	37	3	0.925	0.925	0.925	0.925	0.925	0.921053	0.841667	2	pseudo	SlowFS	RPMabove100	RF
37	3	37	3	0.973684	0.972222	0.973684	0.973684	0.948718	0.947368	0.894737	3	pseudo	SlowFS	RPMabove100	RF
42	5	42	5	0.976744	0.965517	0.976744	0.976744	0.933333	0.921053	0.837026	4	pseudo	SlowFS	RPMabove100	RF
39	3	39	3	0.970588	0.975	0.970588	0.970588	0.95122	0.947368	0.89415	5	pseudo	SlowFS	RPMabove100	RF
38	4	38	4	0.95	0.941176	0.95	0.95	0.926829	0.921053	0.841226	6	pseudo	SlowFS	RPMabove100	RF
39	6	39	6	0.935484	0.95122	0.935484	0.935484	0.906977	0.894737	0.786367	7	pseudo	SlowFS	RPMabove100	RF
40	1	40	1	0.97561	0.97561	0.97561	0.97561	0.97561	0.973684	0.947038	8	pseudo	SlowFS	RPMabove100	RF
40	4	40	4	0.97561	0.96875	0.97561	0.97561	0.941176	0.934211	0.86676	9	pseudo	SlowFS	RPMabove100	RF
40	0	40	0	1	1	1	1	1	1	1	0	RowShuf	FastFS	RPMabove100	RF
40	0	40	0	1	1	1	1	1	1	1	1	RowShuf	FastFS	RPMabove100	RF
40	0	40	0	1	1	1	1	1	1	1	2	RowShuf	FastFS	RPMabove100	RF
43	0	43	0	1	1	1	1	1	1	1	3	RowShuf	FastFS	RPMabove100	RF
45	0	45	0	1	1	1	1	1	1	1	4	RowShuf	FastFS	RPMabove100	RF
40	0	40	0	1	1	1	1	1	1	1	5	RowShuf	FastFS	RPMabove100	RF
42	0	42	0	1	1	1	1	1	1	1	6	RowShuf	FastFS	RPMabove100	RF
44	0	44	0	1	1	1	1	1	1	1	7	RowShuf	FastFS	RPMabove100	RF
45	0	45	0	1	1	1	1	1	1	1	8	RowShuf	FastFS	RPMabove100	RF
41	0	41	0	1	1	1	1	1	1	1	9	RowShuf	FastFS	RPMabove100	RF
37	3	37	3	1	1	1	1	0.961039	0.960526	0.921162	0	ColShuf	FastFS	RPMabove100	RF
35	4	35	4	0.921053	0.918919	0.921053	0.921053	0.909091	0.907895	0.815789	1	ColShuf	FastFS	RPMabove100	RF
44	5	44	5	1	1	1	1	0.946237	0.934211	0.862119	2	ColShuf	FastFS	RPMabove100	RF
48	4	48	4	0.96	0.923077	0.96	0.96	0.941176	0.921053	0.821317	3	ColShuf	FastFS	RPMabove100	RF
39	4	39	4	0.975	0.969697	0.975	0.975	0.939759	0.934211	0.867503	4	ColShuf	FastFS	RPMabove100	RF
44	2	44	2	0.977778	0.966667	0.977778	0.977778	0.967033	0.960526	0.917867	5	ColShuf	FastFS	RPMabove100	RF
41	6	41	6	0.931034	0.953488	0.931034	0.931034	0.911111	0.894737	0.782702	6	ColShuf	FastFS	RPMabove100	RF
36	5	36	5	0.971429	0.972973	0.971429	0.971429	0.923077	0.921053	0.842433	7	ColShuf	FastFS	RPMabove100	RF
34	8	34	8	0.970588	0.971429	0.970588	0.970588	0.883117	0.881579	0.76511	8	ColShuf	FastFS	RPMabove100	RF
35	12	35	12	0.965517	0.972222	0.965517	0.965517	0.843373	0.828947	0.662107	9	ColShuf	FastFS	RPMabove100	RF
42	2	42	2	0.976744	0.96875	0.976744	0.976744	0.965517	0.960526	0.919378	0	pseudo	FastFS	RPMabove100	RF
34	6	34	6	0.918919	0.916667	0.918919	0.918919	0.883117	0.881579	0.763485	1	pseudo	FastFS	RPMabove100	RF
35	5	35	5	0.945946	0.944444	0.945946	0.945946	0.909091	0.907895	0.816044	2	pseudo	FastFS	RPMabove100	RF
41	2	41	2	0.969697	0.97619	0.969697	0.969697	0.964706	0.960526	0.919944	3	pseudo	FastFS	RPMabove100	RF
34	9	34	9	0.909091	0.918919	0.909091	0.909091	0.85	0.842105	0.6853	4	pseudo	FastFS	RPMabove100	RF
38	6	38	6	0.904762	0.875	0.904762	0.904762	0.883721	0.868421	0.732394	5	pseudo	FastFS	RPMabove100	RF
35	4	35	4	0.897436	0.897436	0.897436	0.897436	0.897436	0.894737	0.789328	6	pseudo	FastFS	RPMabove100	RF
40	4	40	4	0.97561	0.96875	0.97561	0.97561	0.941176	0.934211	0.86676	7	pseudo	FastFS	RPMabove100	RF
40	3	40	3	0.939394	0.952381	0.939394	0.939394	0.941176	0.934211	0.866573	8	pseudo	FastFS	RPMabove100	RF
34	6	34	6	0.916667	0.918919	0.916667	0.916667	0.883117	0.881579	0.763485	9	pseudo	FastFS	RPMabove100	RF
44	0	44	0	1	1	1	1	1	1	1	0	RowShuf	LowVarFS	RPMabove100	RF
40	0	40	0	1	1	1	1	1	1	1	1	RowShuf	LowVarFS	RPMabove100	RF
46	0	46	0	1	1	1	1	1	1	1	2	RowShuf	LowVarFS	RPMabove100	RF
40	0	40	0	1	1	1	1	1	1	1	3	RowShuf	LowVarFS	RPMabove100	RF
39	0	39	0	1	1	1	1	1	1	1	4	RowShuf	LowVarFS	RPMabove100	RF
42	0	42	0	1	1	1	1	1	1	1	5	RowShuf	LowVarFS	RPMabove100	RF
38	0	38	0	1	1	1	1	1	1	1	6	RowShuf	LowVarFS	RPMabove100	RF
40	0	40	0	1	1	1	1	1	1	1	7	RowShuf	LowVarFS	RPMabove100	RF
41	0	41	0	1	1	1	1	1	1	1	8	RowShuf	LowVarFS	RPMabove100	RF
46	0	46	0	1	1	1	1	1	1	1	9	RowShuf	LowVarFS	RPMabove100	RF
30	20	30	20	0.769231	0.653846	0.769231	0.769231	0.674157	0.618421	0.230447	0	ColShuf	LowVarFS	RPMabove100	RF
32	20	32	20	0.864865	0.791667	0.864865	0.864865	0.719101	0.671053	0.348422	1	ColShuf	LowVarFS	RPMabove100	RF
29	16	29	16	0.725	0.645161	0.725	0.725	0.682353	0.644737	0.282517	2	ColShuf	LowVarFS	RPMabove100	RF
39	12	39	12	0.847826	0.764706	0.847826	0.847826	0.804124	0.75	0.461194	3	ColShuf	LowVarFS	RPMabove100	RF
28	13	28	13	0.771429	0.777778	0.771429	0.771429	0.727273	0.723684	0.449655	4	ColShuf	LowVarFS	RPMabove100	RF
33	14	33	14	0.804878	0.724138	0.804878	0.804878	0.75	0.710526	0.410021	5	ColShuf	LowVarFS	RPMabove100	RF
31	18	31	18	0.939394	0.925926	0.939394	0.939394	0.756098	0.736842	0.492995	6	ColShuf	LowVarFS	RPMabove100	RF
23	24	23	24	0.71875	0.689655	0.71875	0.71875	0.582278	0.565789	0.162884	7	ColShuf	LowVarFS	RPMabove100	RF
34	17	34	17	0.829268	0.72	0.829268	0.829268	0.73913	0.684211	0.35089	8	ColShuf	LowVarFS	RPMabove100	RF
21	25	21	25	0.7	0.7	0.7	0.7	0.552632	0.552632	0.143236	9	ColShuf	LowVarFS	RPMabove100	RF
37	3	37	3	0.944444	0.948718	0.944444	0.944444	0.936709	0.934211	0.868239	0	pseudo	LowVarFS	RPMabove100	RF
39	4	39	4	1	1	1	1	0.95122	0.947368	0.894371	1	pseudo	LowVarFS	RPMabove100	RF
41	2	41	2	0.97619	0.969697	0.97619	0.97619	0.964706	0.960526	0.919944	2	pseudo	LowVarFS	RPMabove100	RF
40	5	40	5	0.967742	0.97561	0.967742	0.967742	0.930233	0.921053	0.839775	3	pseudo	LowVarFS	RPMabove100	RF
42	3	42	3	0.954545	0.935484	0.954545	0.954545	0.94382	0.934211	0.864479	4	pseudo	LowVarFS	RPMabove100	RF
41	4	41	4	0.935484	0.953488	0.935484	0.935484	0.931818	0.921053	0.838183	5	pseudo	LowVarFS	RPMabove100	RF
36	5	36	5	1	1	1	1	0.935065	0.934211	0.868966	6	pseudo	LowVarFS	RPMabove100	RF
37	2	37	2	0.948718	0.948718	0.948718	0.948718	0.948718	0.947368	0.894664	7	pseudo	LowVarFS	RPMabove100	RF
36	6	36	6	0.947368	0.941176	0.947368	0.947368	0.9	0.894737	0.789474	8	pseudo	LowVarFS	RPMabove100	RF
36	3	36	3	0.923077	0.923077	0.923077	0.923077	0.923077	0.921053	0.841996	9	pseudo	LowVarFS	RPMabove100	RF
28	0	28	0	1	1	1	1	1	1	1	0	RowShuf	SlowFS	miRTarBase	RF
24	0	24	0	1	1	1	1	1	1	1	1	RowShuf	SlowFS	miRTarBase	RF
31	0	31	0	1	1	1	1	1	1	1	2	RowShuf	SlowFS	miRTarBase	RF
24	0	24	0	1	1	1	1	1	1	1	3	RowShuf	SlowFS	miRTarBase	RF
24	0	24	0	1	1	1	1	1	1	1	4	RowShuf	SlowFS	miRTarBase	RF
26	0	26	0	1	1	1	1	1	1	1	5	RowShuf	SlowFS	miRTarBase	RF
24	0	24	0	1	1	1	1	1	1	1	6	RowShuf	SlowFS	miRTarBase	RF
25	0	25	0	1	1	1	1	1	1	1	7	RowShuf	SlowFS	miRTarBase	RF
27	0	27	0	1	1	1	1	1	1	1	8	RowShuf	SlowFS	miRTarBase	RF
32	0	32	0	1	1	1	1	1	1	1	9	RowShuf	SlowFS	miRTarBase	RF
24	2	24	2	0.95	0.96	0.95	0.95	0.941176	0.934783	0.868069	0	ColShuf	SlowFS	miRTarBase	RF
19	9	19	9	0.944444	0.95	0.944444	0.944444	0.791667	0.782609	0.577206	1	ColShuf	SlowFS	miRTarBase	RF
26	2	26	2	0.962963	0.944444	0.962963	0.962963	0.945455	0.934783	0.86444	2	ColShuf	SlowFS	miRTarBase	RF
23	6	23	6	0.958333	0.941176	0.958333	0.958333	0.867925	0.847826	0.692161	3	ColShuf	SlowFS	miRTarBase	RF
23	6	23	6	0.8125	0.884615	0.8125	0.8125	0.836364	0.8	0.581179	4	ColShuf	SlowFS	miRTarBase	RF
21	6	21	6	0.913043	0.894737	0.913043	0.913043	0.84	0.826087	0.652174	5	ColShuf	SlowFS	miRTarBase	RF
19	10	19	10	0.863636	0.823529	0.863636	0.863636	0.745098	0.717391	0.441121	6	ColShuf	SlowFS	miRTarBase	RF
24	7	24	7	0.96	0.933333	0.96	0.96	0.857143	0.826087	0.641326	7	ColShuf	SlowFS	miRTarBase	RF
21	9	21	9	0.913043	0.875	0.913043	0.913043	0.792453	0.76087	0.521739	8	ColShuf	SlowFS	miRTarBase	RF
18	9	18	9	0.833333	0.857143	0.833333	0.833333	0.75	0.733333	0.473684	9	ColShuf	SlowFS	miRTarBase	RF
26	1	26	1	1	1	1	1	0.981132	0.978261	0.955513	0	pseudo	SlowFS	miRTarBase	RF
29	0	29	0	1	1	1	1	1	1	1	1	pseudo	SlowFS	miRTarBase	RF
25	1	25	1	1	1	1	1	0.980392	0.978261	0.956023	2	pseudo	SlowFS	miRTarBase	RF
23	2	23	2	0.958333	0.952381	0.958333	0.958333	0.938776	0.934783	0.86907	3	pseudo	SlowFS	miRTarBase	RF
23	4	23	4	0.888889	0.92	0.888889	0.888889	0.884615	0.866667	0.727273	4	pseudo	SlowFS	miRTarBase	RF
24	3	24	3	0.96	0.947368	0.96	0.96	0.923077	0.913043	0.823417	5	pseudo	SlowFS	miRTarBase	RF
22	2	22	2	0.956522	0.954545	0.956522	0.956522	0.93617	0.934783	0.869565	6	pseudo	SlowFS	miRTarBase	RF
28	2	28	2	0.9375	0.965517	0.9375	0.9375	0.949153	0.934783	0.858316	7	pseudo	SlowFS	miRTarBase	RF
25	3	25	3	0.892857	0.925926	0.892857	0.892857	0.909091	0.891304	0.774067	8	pseudo	SlowFS	miRTarBase	RF
22	4	22	4	1	1	1	1	0.916667	0.911111	0.822835	9	pseudo	SlowFS	miRTarBase	RF
23	0	23	0	1	1	1	1	1	1	1	0	RowShuf	FastFS	miRTarBase	RF
27	0	27	0	1	1	1	1	1	1	1	1	RowShuf	FastFS	miRTarBase	RF
26	0	26	0	1	1	1	1	1	1	1	2	RowShuf	FastFS	miRTarBase	RF
23	0	23	0	1	1	1	1	1	1	1	3	RowShuf	FastFS	miRTarBase	RF
25	0	25	0	1	1	1	1	1	1	1	4	RowShuf	FastFS	miRTarBase	RF
26	0	26	0	1	1	1	1	1	1	1	5	RowShuf	FastFS	miRTarBase	RF
24	0	24	0	1	1	1	1	1	1	1	6	RowShuf	FastFS	miRTarBase	RF
29	0	29	0	1	1	1	1	1	1	1	7	RowShuf	FastFS	miRTarBase	RF
26	0	26	0	1	1	1	1	1	1	1	8	RowShuf	FastFS	miRTarBase	RF
27	0	27	0	1	1	1	1	1	1	1	9	RowShuf	FastFS	miRTarBase	RF
20	6	20	6	0.952381	0.95	0.952381	0.952381	0.851064	0.847826	0.699065	0	ColShuf	FastFS	miRTarBase	RF
20	6	20	6	0.9	0.909091	0.9	0.9	0.833333	0.826087	0.654135	1	ColShuf	FastFS	miRTarBase	RF
19	10	19	10	0.904762	0.882353	0.904762	0.904762	0.76	0.73913	0.489834	2	ColShuf	FastFS	miRTarBase	RF
23	4	23	4	0.851852	0.884615	0.851852	0.851852	0.867925	0.847826	0.688588	3	ColShuf	FastFS	miRTarBase	RF
22	3	22	3	0.956522	0.95	0.956522	0.956522	0.916667	0.911111	0.821782	4	ColShuf	FastFS	miRTarBase	RF
28	4	28	4	1	1	1	1	0.933333	0.913043	0.809917	5	ColShuf	FastFS	miRTarBase	RF
27	6	27	6	1	1	1	1	0.9	0.869565	0.717791	6	ColShuf	FastFS	miRTarBase	RF
27	5	27	5	1	1	1	1	0.915254	0.891304	0.766734	7	ColShuf	FastFS	miRTarBase	RF
22	5	22	5	0.894737	0.916667	0.894737	0.894737	0.862745	0.847826	0.693333	8	ColShuf	FastFS	miRTarBase	RF
21	8	21	8	0.9375	0.954545	0.9375	0.9375	0.823529	0.8	0.602552	9	ColShuf	FastFS	miRTarBase	RF
23	3	23	3	1	1	1	1	0.938776	0.934783	0.869565	0	pseudo	FastFS	miRTarBase	RF
26	4	26	4	1	1	1	1	0.928571	0.913043	0.818898	1	pseudo	FastFS	miRTarBase	RF
27	4	27	4	0.964286	0.933333	0.964286	0.964286	0.915254	0.891304	0.764826	2	pseudo	FastFS	miRTarBase	RF
24	5	24	5	0.96	0.941176	0.96	0.96	0.888889	0.869565	0.733075	3	pseudo	FastFS	miRTarBase	RF
24	1	24	1	0.96	0.96	0.96	0.96	0.96	0.955556	0.91	4	pseudo	FastFS	miRTarBase	RF
20	7	20	7	0.952381	0.947368	0.952381	0.952381	0.833333	0.826087	0.657356	5	pseudo	FastFS	miRTarBase	RF
22	3	22	3	0.916667	0.904762	0.916667	0.916667	0.897959	0.891304	0.781784	6	pseudo	FastFS	miRTarBase	RF
24	2	24	2	0.923077	0.923077	0.923077	0.923077	0.923077	0.913043	0.823077	7	pseudo	FastFS	miRTarBase	RF
27	3	27	3	0.964286	0.9375	0.964286	0.964286	0.931034	0.913043	0.813765	8	pseudo	FastFS	miRTarBase	RF
23	2	23	2	1	1	1	1	0.958333	0.955556	0.910891	9	pseudo	FastFS	miRTarBase	RF
23	0	23	0	1	1	1	1	1	1	1	0	RowShuf	LowVarFS	miRTarBase	RF
27	0	27	0	1	1	1	1	1	1	1	1	RowShuf	LowVarFS	miRTarBase	RF
28	0	28	0	1	1	1	1	1	1	1	2	RowShuf	LowVarFS	miRTarBase	RF
25	0	25	0	1	1	1	1	1	1	1	3	RowShuf	LowVarFS	miRTarBase	RF
25	0	25	0	1	1	1	1	1	1	1	4	RowShuf	LowVarFS	miRTarBase	RF
30	0	30	0	1	1	1	1	1	1	1	5	RowShuf	LowVarFS	miRTarBase	RF
26	0	26	0	1	1	1	1	1	1	1	6	RowShuf	LowVarFS	miRTarBase	RF
24	0	24	0	1	1	1	1	1	1	1	7	RowShuf	LowVarFS	miRTarBase	RF
28	0	28	0	1	1	1	1	1	1	1	8	RowShuf	LowVarFS	miRTarBase	RF
24	0	24	0	1	1	1	1	1	1	1	9	RowShuf	LowVarFS	miRTarBase	RF
20	10	20	10	0.666667	0.689655	0.666667	0.666667	0.677966	0.586957	0.102669	0	ColShuf	LowVarFS	miRTarBase	RF
16	12	16	12	0.571429	0.592593	0.571429	0.571429	0.581818	0.5	-0.0392927	1	ColShuf	LowVarFS	miRTarBase	RF
12	16	12	16	0.521739	0.428571	0.521739	0.521739	0.470588	0.413043	-0.173913	2	ColShuf	LowVarFS	miRTarBase	RF
21	8	21	8	0.807692	0.724138	0.807692	0.807692	0.763636	0.717391	0.414873	3	ColShuf	LowVarFS	miRTarBase	RF
19	16	19	16	0.863636	0.7	0.863636	0.863636	0.666667	0.577778	0.165854	4	ColShuf	LowVarFS	miRTarBase	RF
16	14	16	14	0.761905	0.6875	0.761905	0.761905	0.627451	0.586957	0.195212	5	ColShuf	LowVarFS	miRTarBase	RF
13	12	13	12	0.619048	0.619048	0.619048	0.619048	0.565217	0.565217	0.136961	6	ColShuf	LowVarFS	miRTarBase	RF
13	17	13	17	0.722222	0.6875	0.722222	0.722222	0.541667	0.521739	0.102837	7	ColShuf	LowVarFS	miRTarBase	RF
16	9	16	9	0.666667	0.695652	0.666667	0.666667	0.666667	0.652174	0.304348	8	ColShuf	LowVarFS	miRTarBase	RF
9	21	9	21	0.473684	0.333333	0.473684	0.473684	0.367347	0.311111	-0.309859	9	ColShuf	LowVarFS	miRTarBase	RF
22	3	22	3	0.956522	0.952381	0.956522	0.956522	0.916667	0.913043	0.826087	0	pseudo	LowVarFS	miRTarBase	RF
26	3	26	3	1	1	1	1	0.945455	0.934783	0.864971	1	pseudo	LowVarFS	miRTarBase	RF
25	2	25	2	1	1	1	1	0.961538	0.956522	0.911708	2	pseudo	LowVarFS	miRTarBase	RF
27	2	27	2	1	1	1	1	0.964286	0.956522	0.908911	3	pseudo	LowVarFS	miRTarBase	RF
25	1	25	1	1	1	1	1	0.980392	0.977778	0.954774	4	pseudo	LowVarFS	miRTarBase	RF
22	2	22	2	0.956522	0.954545	0.956522	0.956522	0.93617	0.934783	0.869565	5	pseudo	LowVarFS	miRTarBase	RF
28	3	28	3	0.903226	0.933333	0.903226	0.903226	0.918033	0.891304	0.756871	6	pseudo	LowVarFS	miRTarBase	RF
24	2	24	2	1	1	1	1	0.96	0.956522	0.912548	7	pseudo	LowVarFS	miRTarBase	RF
27	0	27	0	1	1	1	1	1	1	1	8	pseudo	LowVarFS	miRTarBase	RF
20	4	20	4	0.909091	0.904762	0.909091	0.909091	0.869565	0.866667	0.733728	9	pseudo	LowVarFS	miRTarBase	RF
70	0	70	0	1	1	1	1	1	1	1	0	RowShuf	SlowFS	RPMbelow100	RF
74	0	74	0	1	1	1	1	1	1	1	1	RowShuf	SlowFS	RPMbelow100	RF
74	0	74	0	1	1	1	1	1	1	1	2	RowShuf	SlowFS	RPMbelow100	RF
84	0	84	0	1	1	1	1	1	1	1	3	RowShuf	SlowFS	RPMbelow100	RF
76	0	76	0	1	1	1	1	1	1	1	4	RowShuf	SlowFS	RPMbelow100	RF
68	0	68	0	1	1	1	1	1	1	1	5	RowShuf	SlowFS	RPMbelow100	RF
68	0	68	0	1	1	1	1	1	1	1	6	RowShuf	SlowFS	RPMbelow100	RF
73	0	73	0	1	1	1	1	1	1	1	7	RowShuf	SlowFS	RPMbelow100	RF
75	0	75	0	1	1	1	1	1	1	1	8	RowShuf	SlowFS	RPMbelow100	RF
94	0	94	0	1	1	1	1	1	1	1	9	RowShuf	SlowFS	RPMbelow100	RF
79	3	79	3	1	1	1	1	0.981366	0.977778	0.953867	0	ColShuf	SlowFS	RPMbelow100	RF
69	4	69	4	1	1	1	1	0.971831	0.97037	0.940633	1	ColShuf	SlowFS	RPMbelow100	RF
70	4	70	4	0.985915	0.983333	0.985915	0.985915	0.965517	0.962687	0.924905	2	ColShuf	SlowFS	RPMbelow100	RF
68	7	68	7	1	1	1	1	0.951049	0.948148	0.896211	3	ColShuf	SlowFS	RPMbelow100	RF
75	5	75	5	0.986842	0.981481	0.986842	0.986842	0.961538	0.955224	0.908051	4	ColShuf	SlowFS	RPMbelow100	RF
73	3	73	3	1	1	1	1	0.979866	0.977778	0.955095	5	ColShuf	SlowFS	RPMbelow100	RF
70	3	70	3	1	1	1	1	0.979021	0.977778	0.955421	6	ColShuf	SlowFS	RPMbelow100	RF
74	3	74	3	1	1	1	1	0.980132	0.977612	0.954515	7	ColShuf	SlowFS	RPMbelow100	RF
73	4	73	4	0.982759	0.986486	0.982759	0.982759	0.966887	0.962963	0.924908	8	ColShuf	SlowFS	RPMbelow100	RF
71	7	71	7	1	1	1	1	0.95302	0.947761	0.894488	9	ColShuf	SlowFS	RPMbelow100	RF
61	12	61	12	0.870968	0.884058	0.870968	0.870968	0.859155	0.851852	0.703166	0	pseudo	SlowFS	RPMbelow100	RF
65	8	65	8	0.890411	0.890411	0.890411	0.890411	0.890411	0.881481	0.761379	1	pseudo	SlowFS	RPMbelow100	RF
61	9	61	9	0.924242	0.921875	0.924242	0.924242	0.897059	0.895522	0.791184	2	pseudo	SlowFS	RPMbelow100	RF
65	8	65	8	0.955882	0.951613	0.955882	0.955882	0.921986	0.918519	0.836939	3	pseudo	SlowFS	RPMbelow100	RF
63	4	63	4	0.940299	0.940299	0.940299	0.940299	0.940299	0.940299	0.880597	4	pseudo	SlowFS	RPMbelow100	RF
64	10	64	10	0.918033	0.927536	0.918033	0.918033	0.895105	0.888889	0.777301	5	pseudo	SlowFS	RPMbelow100	RF
66	10	66	10	0.949153	0.956522	0.949153	0.949153	0.910345	0.903704	0.806867	6	pseudo	SlowFS	RPMbelow100	RF
65	7	65	7	0.951613	0.955882	0.951613	0.951613	0.928571	0.925373	0.85058	7	pseudo	SlowFS	RPMbelow100	RF
57	17	57	17	0.826087	0.803279	0.826087	0.826087	0.797203	0.785185	0.569449	8	pseudo	SlowFS	RPMbelow100	RF
70	8	70	8	0.946429	0.958904	0.946429	0.946429	0.927152	0.91791	0.833371	9	pseudo	SlowFS	RPMbelow100	RF
69	0	69	0	1	1	1	1	1	1	1	0	RowShuf	FastFS	RPMbelow100	RF
74	0	74	0	1	1	1	1	1	1	1	1	RowShuf	FastFS	RPMbelow100	RF
67	0	67	0	1	1	1	1	1	1	1	2	RowShuf	FastFS	RPMbelow100	RF
78	0	78	0	1	1	1	1	1	1	1	3	RowShuf	FastFS	RPMbelow100	RF
80	0	80	0	1	1	1	1	1	1	1	4	RowShuf	FastFS	RPMbelow100	RF
79	0	79	0	1	1	1	1	1	1	1	5	RowShuf	FastFS	RPMbelow100	RF
72	0	72	0	1	1	1	1	1	1	1	6	RowShuf	FastFS	RPMbelow100	RF
69	0	69	0	1	1	1	1	1	1	1	7	RowShuf	FastFS	RPMbelow100	RF
76	0	76	0	1	1	1	1	1	1	1	8	RowShuf	FastFS	RPMbelow100	RF
82	0	82	0	1	1	1	1	1	1	1	9	RowShuf	FastFS	RPMbelow100	RF
64	9	64	9	0.983871	0.984615	0.983871	0.983871	0.927536	0.925926	0.852298	0	ColShuf	FastFS	RPMbelow100	RF
72	4	72	4	0.949153	0.96	0.949153	0.949153	0.953642	0.948148	0.894825	1	ColShuf	FastFS	RPMbelow100	RF
66	4	66	4	0.956522	0.953125	0.956522	0.956522	0.94964	0.947761	0.895383	2	ColShuf	FastFS	RPMbelow100	RF
72	3	72	3	0.972973	0.966667	0.972973	0.972973	0.966443	0.962963	0.925125	3	ColShuf	FastFS	RPMbelow100	RF
71	3	71	3	0.986111	0.983333	0.986111	0.986111	0.972603	0.970149	0.939829	4	ColShuf	FastFS	RPMbelow100	RF
71	5	71	5	1	1	1	1	0.965986	0.962963	0.925439	5	ColShuf	FastFS	RPMbelow100	RF
76	4	76	4	0.963636	0.974359	0.963636	0.963636	0.962025	0.955556	0.908475	6	ColShuf	FastFS	RPMbelow100	RF
66	2	66	2	1	1	1	1	0.985075	0.985075	0.970156	7	ColShuf	FastFS	RPMbelow100	RF
71	4	71	4	1	1	1	1	0.972603	0.97037	0.940397	8	ColShuf	FastFS	RPMbelow100	RF
73	4	73	4	0.982456	0.986486	0.982456	0.982456	0.966887	0.962687	0.924191	9	ColShuf	FastFS	RPMbelow100	RF
62	13	62	13	0.873239	0.85	0.873239	0.873239	0.849315	0.837037	0.672185	0	pseudo	FastFS	RPMbelow100	RF
58	13	58	13	0.90625	0.90625	0.90625	0.90625	0.859259	0.859259	0.719273	1	pseudo	FastFS	RPMbelow100	RF
69	19	69	19	0.896104	0.826087	0.896104	0.896104	0.836364	0.798507	0.577238	2	pseudo	FastFS	RPMbelow100	RF
60	13	60	13	0.857143	0.83871	0.857143	0.857143	0.839161	0.82963	0.658228	3	pseudo	FastFS	RPMbelow100	RF
59	13	59	13	0.822581	0.842857	0.822581	0.822581	0.830986	0.820896	0.64059	4	pseudo	FastFS	RPMbelow100	RF
66	10	66	10	0.90411	0.881356	0.90411	0.90411	0.885906	0.874074	0.745537	5	pseudo	FastFS	RPMbelow100	RF
59	12	59	12	0.855072	0.84375	0.855072	0.855072	0.842857	0.837037	0.673698	6	pseudo	FastFS	RPMbelow100	RF
56	16	56	16	0.875	0.870968	0.875	0.875	0.823529	0.820896	0.642984	7	pseudo	FastFS	RPMbelow100	RF
66	12	66	12	0.894737	0.916667	0.894737	0.894737	0.88	0.866667	0.730539	8	pseudo	FastFS	RPMbelow100	RF
51	24	51	24	0.847458	0.85	0.847458	0.847458	0.755556	0.753731	0.513531	9	pseudo	FastFS	RPMbelow100	RF
72	0	72	0	1	1	1	1	1	1	1	0	RowShuf	LowVarFS	RPMbelow100	RF
76	0	76	0	1	1	1	1	1	1	1	1	RowShuf	LowVarFS	RPMbelow100	RF
67	0	67	0	1	1	1	1	1	1	1	2	RowShuf	LowVarFS	RPMbelow100	RF
78	0	78	0	1	1	1	1	1	1	1	3	RowShuf	LowVarFS	RPMbelow100	RF
70	0	70	0	1	1	1	1	1	1	1	4	RowShuf	LowVarFS	RPMbelow100	RF
70	0	70	0	1	1	1	1	1	1	1	5	RowShuf	LowVarFS	RPMbelow100	RF
76	0	76	0	1	1	1	1	1	1	1	6	RowShuf	LowVarFS	RPMbelow100	RF
71	0	71	0	1	1	1	1	1	1	1	7	RowShuf	LowVarFS	RPMbelow100	RF
71	0	71	0	1	1	1	1	1	1	1	8	RowShuf	LowVarFS	RPMbelow100	RF
74	0	74	0	1	1	1	1	1	1	1	9	RowShuf	LowVarFS	RPMbelow100	RF
60	25	60	25	0.821918	0.74	0.821918	0.821918	0.759494	0.718519	0.424888	0	ColShuf	LowVarFS	RPMbelow100	RF
57	13	57	13	0.815385	0.826087	0.815385	0.815385	0.820144	0.814815	0.629325	1	ColShuf	LowVarFS	RPMbelow100	RF
58	24	58	24	0.828571	0.769231	0.828571	0.828571	0.763158	0.731343	0.457246	2	ColShuf	LowVarFS	RPMbelow100	RF
59	23	59	23	0.808219	0.735849	0.808219	0.808219	0.76129	0.725926	0.442086	3	ColShuf	LowVarFS	RPMbelow100	RF
53	21	53	21	0.779412	0.75	0.779412	0.779412	0.746479	0.731343	0.461847	4	ColShuf	LowVarFS	RPMbelow100	RF
58	19	58	19	0.84058	0.810345	0.84058	0.84058	0.794521	0.777778	0.554161	5	ColShuf	LowVarFS	RPMbelow100	RF
49	29	49	29	0.720588	0.666667	0.720588	0.720588	0.671233	0.644444	0.288069	6	ColShuf	LowVarFS	RPMbelow100	RF
51	34	51	34	0.822581	0.77551	0.822581	0.822581	0.693878	0.664179	0.341559	7	ColShuf	LowVarFS	RPMbelow100	RF
49	30	49	30	0.790323	0.767857	0.790323	0.790323	0.695035	0.681481	0.371685	8	ColShuf	LowVarFS	RPMbelow100	RF
50	26	50	26	0.775862	0.793651	0.775862	0.775862	0.719424	0.708955	0.422541	9	ColShuf	LowVarFS	RPMbelow100	RF
64	8	64	8	0.914286	0.904762	0.914286	0.914286	0.901408	0.896296	0.792079	0	pseudo	LowVarFS	RPMbelow100	RF
66	10	66	10	0.966102	0.970588	0.966102	0.966102	0.916667	0.911111	0.822056	1	pseudo	LowVarFS	RPMbelow100	RF
65	9	65	9	0.942029	0.933333	0.942029	0.942029	0.909091	0.902985	0.805363	2	pseudo	LowVarFS	RPMbelow100	RF
67	10	67	10	0.87013	0.881579	0.87013	0.87013	0.875817	0.859259	0.71344	3	pseudo	LowVarFS	RPMbelow100	RF
66	6	66	6	0.956522	0.951613	0.956522	0.956522	0.93617	0.932836	0.865372	4	pseudo	LowVarFS	RPMbelow100	RF
60	10	60	10	0.909091	0.907692	0.909091	0.909091	0.882353	0.881481	0.763158	5	pseudo	LowVarFS	RPMbelow100	RF
61	11	61	11	0.847222	0.859155	0.847222	0.847222	0.853147	0.844444	0.68781	6	pseudo	LowVarFS	RPMbelow100	RF
61	8	61	8	0.897059	0.892308	0.897059	0.897059	0.890511	0.88806	0.77602	7	pseudo	LowVarFS	RPMbelow100	RF
58	13	58	13	0.878788	0.875	0.878788	0.878788	0.846715	0.844444	0.689247	8	pseudo	LowVarFS	RPMbelow100	RF
71	7	71	7	0.959459	0.946429	0.959459	0.959459	0.934211	0.925373	0.848141	9	pseudo	LowVarFS	RPMbelow100	RF
147	0	147	0	1	1	1	1	1	1	1	0	RowShuf	SlowFS	AllMirGeneDB	RF
154	0	154	0	1	1	1	1	1	1	1	1	RowShuf	SlowFS	AllMirGeneDB	RF
158	0	158	0	1	1	1	1	1	1	1	2	RowShuf	SlowFS	AllMirGeneDB	RF
153	0	153	0	1	1	1	1	1	1	1	3	RowShuf	SlowFS	AllMirGeneDB	RF
151	0	151	0	1	1	1	1	1	1	1	4	RowShuf	SlowFS	AllMirGeneDB	RF
150	0	150	0	1	1	1	1	1	1	1	5	RowShuf	SlowFS	AllMirGeneDB	RF
153	0	153	0	1	1	1	1	1	1	1	6	RowShuf	SlowFS	AllMirGeneDB	RF
146	0	146	0	1	1	1	1	1	1	1	7	RowShuf	SlowFS	AllMirGeneDB	RF
159	0	159	0	1	1	1	1	1	1	1	8	RowShuf	SlowFS	AllMirGeneDB	RF
161	0	161	0	1	1	1	1	1	1	1	9	RowShuf	SlowFS	AllMirGeneDB	RF
148	3	148	3	1	1	1	1	0.989967	0.989547	0.97906	0	ColShuf	SlowFS	AllMirGeneDB	RF
157	2	157	2	1	1	1	1	0.993671	0.993031	0.98592	1	ColShuf	SlowFS	AllMirGeneDB	RF
156	2	156	2	0.987342	0.987342	0.987342	0.987342	0.987342	0.986063	0.971838	2	ColShuf	SlowFS	AllMirGeneDB	RF
153	3	153	3	0.987097	0.984733	0.987097	0.987097	0.983923	0.982578	0.964912	3	ColShuf	SlowFS	AllMirGeneDB	RF
150	2	150	2	0.992537	0.993377	0.992537	0.992537	0.990099	0.98951	0.978947	4	ColShuf	SlowFS	AllMirGeneDB	RF
140	7	140	7	1	1	1	1	0.97561	0.97561	0.951249	5	ColShuf	SlowFS	AllMirGeneDB	RF
152	8	152	8	1	1	1	1	0.974359	0.972125	0.943869	6	ColShuf	SlowFS	AllMirGeneDB	RF
152	2	152	2	1	1	1	1	0.993464	0.993031	0.986002	7	ColShuf	SlowFS	AllMirGeneDB	RF
153	3	153	3	0.987097	0.984733	0.987097	0.987097	0.983923	0.982578	0.964912	8	ColShuf	SlowFS	AllMirGeneDB	RF
158	3	158	3	1	1	1	1	0.990596	0.98951	0.97874	9	ColShuf	SlowFS	AllMirGeneDB	RF
153	4	153	4	0.974522	0.974522	0.974522	0.974522	0.974522	0.972125	0.943753	0	pseudo	SlowFS	AllMirGeneDB	RF
148	3	148	3	0.993289	0.992647	0.993289	0.993289	0.986667	0.986063	0.972069	1	pseudo	SlowFS	AllMirGeneDB	RF
141	5	141	5	0.979167	0.978723	0.979167	0.979167	0.972414	0.972125	0.944247	2	pseudo	SlowFS	AllMirGeneDB	RF
153	5	153	5	0.984496	0.987097	0.984496	0.984496	0.977636	0.97561	0.950821	3	pseudo	SlowFS	AllMirGeneDB	RF
161	5	161	5	0.975	0.981707	0.975	0.975	0.975758	0.972028	0.942703	4	pseudo	SlowFS	AllMirGeneDB	RF
146	3	146	3	0.993197	0.992754	0.993197	0.993197	0.986486	0.986063	0.972099	5	pseudo	SlowFS	AllMirGeneDB	RF
143	5	143	5	0.979452	0.978417	0.979452	0.979452	0.972789	0.972125	0.94422	6	pseudo	SlowFS	AllMirGeneDB	RF
151	5	151	5	0.977099	0.980519	0.977099	0.977099	0.974194	0.972125	0.943893	7	pseudo	SlowFS	AllMirGeneDB	RF
152	3	152	3	0.984848	0.987013	0.984848	0.984848	0.983819	0.982578	0.964951	8	pseudo	SlowFS	AllMirGeneDB	RF
177	5	177	5	0.972527	0.983333	0.972527	0.972527	0.977901	0.972028	0.939808	9	pseudo	SlowFS	AllMirGeneDB	RF
149	0	149	0	1	1	1	1	1	1	1	0	RowShuf	FastFS	AllMirGeneDB	RF
148	0	148	0	1	1	1	1	1	1	1	1	RowShuf	FastFS	AllMirGeneDB	RF
154	0	154	0	1	1	1	1	1	1	1	2	RowShuf	FastFS	AllMirGeneDB	RF
165	0	165	0	1	1	1	1	1	1	1	3	RowShuf	FastFS	AllMirGeneDB	RF
145	0	145	0	1	1	1	1	1	1	1	4	RowShuf	FastFS	AllMirGeneDB	RF
165	0	165	0	1	1	1	1	1	1	1	5	RowShuf	FastFS	AllMirGeneDB	RF
161	0	161	0	1	1	1	1	1	1	1	6	RowShuf	FastFS	AllMirGeneDB	RF
153	0	153	0	1	1	1	1	1	1	1	7	RowShuf	FastFS	AllMirGeneDB	RF
170	0	170	0	1	1	1	1	1	1	1	8	RowShuf	FastFS	AllMirGeneDB	RF
161	0	161	0	1	1	1	1	1	1	1	9	RowShuf	FastFS	AllMirGeneDB	RF
168	4	168	4	0.988235	0.982609	0.988235	0.988235	0.982456	0.979094	0.956596	0	ColShuf	FastFS	AllMirGeneDB	RF
139	14	139	14	0.978873	0.977612	0.978873	0.978873	0.942373	0.940767	0.881615	1	ColShuf	FastFS	AllMirGeneDB	RF
139	10	139	10	0.978873	0.978261	0.978873	0.978873	0.955326	0.954704	0.909444	2	ColShuf	FastFS	AllMirGeneDB	RF
136	19	136	19	0.971429	0.969697	0.971429	0.971429	0.922034	0.919861	0.840034	3	ColShuf	FastFS	AllMirGeneDB	RF
152	10	152	10	0.974359	0.967742	0.974359	0.974359	0.955975	0.951049	0.900901	4	ColShuf	FastFS	AllMirGeneDB	RF
144	14	144	14	0.993103	0.992248	0.993103	0.993103	0.950495	0.947735	0.89536	5	ColShuf	FastFS	AllMirGeneDB	RF
148	11	148	11	1	1	1	1	0.964169	0.961672	0.923084	6	ColShuf	FastFS	AllMirGeneDB	RF
143	4	143	4	0.985714	0.986207	0.985714	0.985714	0.979452	0.979094	0.958177	7	ColShuf	FastFS	AllMirGeneDB	RF
135	24	135	24	0.976562	0.978261	0.976562	0.976562	0.909091	0.905923	0.812622	8	ColShuf	FastFS	AllMirGeneDB	RF
155	8	155	8	0.97561	0.981013	0.97561	0.97561	0.965732	0.961538	0.921932	9	ColShuf	FastFS	AllMirGeneDB	RF
141	6	141	6	0.972414	0.971429	0.972414	0.972414	0.965753	0.965157	0.930296	0	pseudo	FastFS	AllMirGeneDB	RF
138	11	138	11	0.971831	0.971014	0.971831	0.971831	0.948454	0.947735	0.895512	1	pseudo	FastFS	AllMirGeneDB	RF
145	8	145	8	0.973154	0.970149	0.973154	0.973154	0.960265	0.958188	0.916164	2	pseudo	FastFS	AllMirGeneDB	RF
156	9	156	9	0.95082	0.962963	0.95082	0.95082	0.954128	0.947735	0.893412	3	pseudo	FastFS	AllMirGeneDB	RF
154	7	154	7	0.987179	0.984	0.987179	0.987179	0.971609	0.968531	0.936334	4	pseudo	FastFS	AllMirGeneDB	RF
162	3	162	3	0.991803	0.993865	0.991803	0.991803	0.987805	0.986063	0.971546	5	pseudo	FastFS	AllMirGeneDB	RF
140	15	140	15	0.969697	0.972222	0.969697	0.969697	0.936455	0.933798	0.867559	6	pseudo	FastFS	AllMirGeneDB	RF
156	5	156	5	0.968944	0.968944	0.968944	0.968944	0.968944	0.965157	0.929262	7	pseudo	FastFS	AllMirGeneDB	RF
145	8	145	8	0.962687	0.966667	0.962687	0.962687	0.957096	0.954704	0.909135	8	pseudo	FastFS	AllMirGeneDB	RF
157	9	157	9	0.958333	0.969136	0.958333	0.958333	0.957317	0.951049	0.89996	9	pseudo	FastFS	AllMirGeneDB	RF
145	0	145	0	1	1	1	1	1	1	1	0	RowShuf	LowVarFS	AllMirGeneDB	RF
159	0	159	0	1	1	1	1	1	1	1	1	RowShuf	LowVarFS	AllMirGeneDB	RF
155	0	155	0	1	1	1	1	1	1	1	2	RowShuf	LowVarFS	AllMirGeneDB	RF
147	0	147	0	1	1	1	1	1	1	1	3	RowShuf	LowVarFS	AllMirGeneDB	RF
162	0	162	0	1	1	1	1	1	1	1	4	RowShuf	LowVarFS	AllMirGeneDB	RF
155	0	155	0	1	1	1	1	1	1	1	5	RowShuf	LowVarFS	AllMirGeneDB	RF
144	0	144	0	1	1	1	1	1	1	1	6	RowShuf	LowVarFS	AllMirGeneDB	RF
164	0	164	0	1	1	1	1	1	1	1	7	RowShuf	LowVarFS	AllMirGeneDB	RF
161	0	161	0	1	1	1	1	1	1	1	8	RowShuf	LowVarFS	AllMirGeneDB	RF
167	0	167	0	1	1	1	1	1	1	1	9	RowShuf	LowVarFS	AllMirGeneDB	RF
122	53	122	53	0.865248	0.830357	0.865248	0.865248	0.772152	0.749129	0.500169	0	ColShuf	LowVarFS	AllMirGeneDB	RF
131	43	131	43	0.873333	0.831858	0.873333	0.873333	0.808642	0.783972	0.563744	1	ColShuf	LowVarFS	AllMirGeneDB	RF
128	44	128	44	0.870748	0.834783	0.870748	0.870748	0.802508	0.780488	0.558839	2	ColShuf	LowVarFS	AllMirGeneDB	RF
128	49	128	49	0.85906	0.809091	0.85906	0.85906	0.785276	0.756098	0.507791	3	ColShuf	LowVarFS	AllMirGeneDB	RF
134	37	134	37	0.822086	0.783626	0.822086	0.822086	0.802395	0.769231	0.525466	4	ColShuf	LowVarFS	AllMirGeneDB	RF
126	57	126	57	0.868966	0.817308	0.868966	0.868966	0.768293	0.735192	0.468855	5	ColShuf	LowVarFS	AllMirGeneDB	RF
131	49	131	49	0.861842	0.803738	0.861842	0.861842	0.789157	0.756098	0.504733	6	ColShuf	LowVarFS	AllMirGeneDB	RF
117	43	117	43	0.818182	0.795276	0.818182	0.818182	0.772277	0.759582	0.519356	7	ColShuf	LowVarFS	AllMirGeneDB	RF
115	59	115	59	0.934959	0.929204	0.934959	0.934959	0.774411	0.766551	0.54686	8	ColShuf	LowVarFS	AllMirGeneDB	RF
112	53	112	53	0.859504	0.868217	0.859504	0.859504	0.761905	0.755245	0.517753	9	ColShuf	LowVarFS	AllMirGeneDB	RF
145	8	145	8	0.962687	0.966667	0.962687	0.962687	0.957096	0.954704	0.909135	0	pseudo	LowVarFS	AllMirGeneDB	RF
143	9	143	9	0.959732	0.955556	0.959732	0.959732	0.950166	0.947735	0.895233	1	pseudo	LowVarFS	AllMirGeneDB	RF
153	6	153	6	0.976562	0.980769	0.976562	0.976562	0.971429	0.968641	0.936687	2	pseudo	LowVarFS	AllMirGeneDB	RF
140	4	140	4	0.972222	0.972222	0.972222	0.972222	0.972222	0.972125	0.94425	3	pseudo	LowVarFS	AllMirGeneDB	RF
150	5	150	5	0.993377	0.992366	0.993377	0.993377	0.980392	0.979021	0.957844	4	pseudo	LowVarFS	AllMirGeneDB	RF
147	14	147	14	0.960784	0.952381	0.960784	0.960784	0.936306	0.930314	0.859493	5	pseudo	LowVarFS	AllMirGeneDB	RF
154	7	154	7	0.960317	0.968553	0.960317	0.960317	0.9625	0.958188	0.91526	6	pseudo	LowVarFS	AllMirGeneDB	RF
156	7	156	7	0.957055	0.962963	0.957055	0.957055	0.96	0.954704	0.907792	7	pseudo	LowVarFS	AllMirGeneDB	RF
142	11	142	11	0.977612	0.97931	0.977612	0.977612	0.95302	0.95122	0.902371	8	pseudo	LowVarFS	AllMirGeneDB	RF
156	5	156	5	0.968944	0.968944	0.968944	0.968944	0.968944	0.965035	0.928944	9	pseudo	LowVarFS	AllMirGeneDB	RF
57	0	57	0	1	1	1	1	1	1	1	0	RowShuf	SlowFS	HsaMirGeneDB	RF
56	0	56	0	1	1	1	1	1	1	1	1	RowShuf	SlowFS	HsaMirGeneDB	RF
55	0	55	0	1	1	1	1	1	1	1	2	RowShuf	SlowFS	HsaMirGeneDB	RF
56	0	56	0	1	1	1	1	1	1	1	3	RowShuf	SlowFS	HsaMirGeneDB	RF
54	0	54	0	1	1	1	1	1	1	1	4	RowShuf	SlowFS	HsaMirGeneDB	RF
57	0	57	0	1	1	1	1	1	1	1	5	RowShuf	SlowFS	HsaMirGeneDB	RF
56	0	56	0	1	1	1	1	1	1	1	6	RowShuf	SlowFS	HsaMirGeneDB	RF
56	0	56	0	1	1	1	1	1	1	1	7	RowShuf	SlowFS	HsaMirGeneDB	RF
63	0	63	0	1	1	1	1	1	1	1	8	RowShuf	SlowFS	HsaMirGeneDB	RF
54	0	54	0	1	1	1	1	1	1	1	9	RowShuf	SlowFS	HsaMirGeneDB	RF
49	10	49	10	0.960784	0.956522	0.960784	0.960784	0.890909	0.885714	0.772234	0	ColShuf	SlowFS	HsaMirGeneDB	RF
63	7	63	7	0.984375	0.971429	0.984375	0.984375	0.940299	0.92381	0.835616	1	ColShuf	SlowFS	HsaMirGeneDB	RF
58	4	58	4	0.952381	0.966667	0.952381	0.952381	0.95082	0.942308	0.881098	2	ColShuf	SlowFS	HsaMirGeneDB	RF
55	3	55	3	0.982143	0.978723	0.982143	0.982143	0.964912	0.961905	0.923274	3	ColShuf	SlowFS	HsaMirGeneDB	RF
56	4	56	4	0.982456	0.977273	0.982456	0.982456	0.957265	0.951923	0.902402	4	ColShuf	SlowFS	HsaMirGeneDB	RF
54	2	54	2	0.981818	0.979592	0.981818	0.981818	0.972973	0.971429	0.942675	5	ColShuf	SlowFS	HsaMirGeneDB	RF
49	7	49	7	0.979592	0.98	0.979592	0.979592	0.924528	0.92381	0.848101	6	ColShuf	SlowFS	HsaMirGeneDB	RF
55	0	55	0	1	1	1	1	1	1	1	7	ColShuf	SlowFS	HsaMirGeneDB	RF
57	7	57	7	0.97561	0.982759	0.97561	0.97561	0.934426	0.92381	0.84404	8	ColShuf	SlowFS	HsaMirGeneDB	RF
60	5	60	5	0.974359	0.983607	0.974359	0.974359	0.952381	0.942308	0.879397	9	ColShuf	SlowFS	HsaMirGeneDB	RF
52	2	52	2	0.962963	0.962963	0.962963	0.962963	0.962963	0.961905	0.923747	0	pseudo	SlowFS	HsaMirGeneDB	RF
54	5	54	5	0.978261	0.981818	0.978261	0.978261	0.947368	0.942857	0.885036	1	pseudo	SlowFS	HsaMirGeneDB	RF
59	3	59	3	0.952381	0.967213	0.952381	0.952381	0.95935	0.951923	0.900536	2	pseudo	SlowFS	HsaMirGeneDB	RF
55	2	55	2	0.982143	0.979167	0.982143	0.982143	0.973451	0.971429	0.942529	3	pseudo	SlowFS	HsaMirGeneDB	RF
56	1	56	1	1	1	1	1	0.99115	0.990385	0.980626	4	pseudo	SlowFS	HsaMirGeneDB	RF
53	1	53	1	1	1	1	1	0.990654	0.990476	0.980947	5	pseudo	SlowFS	HsaMirGeneDB	RF
54	2	54	2	0.979592	0.981818	0.979592	0.979592	0.972973	0.971429	0.942675	6	pseudo	SlowFS	HsaMirGeneDB	RF
55	1	55	1	0.982143	0.982143	0.982143	0.982143	0.982143	0.980769	0.96131	7	pseudo	SlowFS	HsaMirGeneDB	RF
58	3	58	3	0.977273	0.983051	0.977273	0.977273	0.966667	0.961905	0.922251	8	pseudo	SlowFS	HsaMirGeneDB	RF
55	1	55	1	1	1	1	1	0.990991	0.990385	0.980684	9	pseudo	SlowFS	HsaMirGeneDB	RF
59	0	59	0	1	1	1	1	1	1	1	0	RowShuf	FastFS	HsaMirGeneDB	RF
54	0	54	0	1	1	1	1	1	1	1	1	RowShuf	FastFS	HsaMirGeneDB	RF
61	0	61	0	1	1	1	1	1	1	1	2	RowShuf	FastFS	HsaMirGeneDB	RF
58	0	58	0	1	1	1	1	1	1	1	3	RowShuf	FastFS	HsaMirGeneDB	RF
63	0	63	0	1	1	1	1	1	1	1	4	RowShuf	FastFS	HsaMirGeneDB	RF
56	0	56	0	1	1	1	1	1	1	1	5	RowShuf	FastFS	HsaMirGeneDB	RF
69	0	69	0	1	1	1	1	1	1	1	6	RowShuf	FastFS	HsaMirGeneDB	RF
54	0	54	0	1	1	1	1	1	1	1	7	RowShuf	FastFS	HsaMirGeneDB	RF
58	0	58	0	1	1	1	1	1	1	1	8	RowShuf	FastFS	HsaMirGeneDB	RF
64	0	64	0	1	1	1	1	1	1	1	9	RowShuf	FastFS	HsaMirGeneDB	RF
49	7	49	7	0.959184	0.960784	0.959184	0.959184	0.915888	0.914286	0.828897	0	ColShuf	FastFS	HsaMirGeneDB	RF
57	7	57	7	0.95	0.926829	0.95	0.95	0.919355	0.904762	0.803371	1	ColShuf	FastFS	HsaMirGeneDB	RF
54	7	54	7	0.981818	0.976744	0.981818	0.981818	0.931034	0.923077	0.844602	2	ColShuf	FastFS	HsaMirGeneDB	RF
58	6	58	6	0.95082	0.926829	0.95082	0.95082	0.928	0.914286	0.822268	3	ColShuf	FastFS	HsaMirGeneDB	RF
58	9	58	9	0.966667	0.945946	0.966667	0.966667	0.913386	0.894231	0.778638	4	ColShuf	FastFS	HsaMirGeneDB	RF
49	6	49	6	0.96	0.960784	0.96	0.96	0.924528	0.92381	0.847826	5	ColShuf	FastFS	HsaMirGeneDB	RF
47	12	47	12	0.978261	0.979167	0.978261	0.978261	0.878505	0.87619	0.754981	6	ColShuf	FastFS	HsaMirGeneDB	RF
49	5	49	5	0.98	0.98	0.98	0.98	0.942308	0.942308	0.884786	7	ColShuf	FastFS	HsaMirGeneDB	RF
54	9	54	9	1	1	1	1	0.923077	0.914286	0.827586	8	ColShuf	FastFS	HsaMirGeneDB	RF
56	10	56	10	0.973684	0.982456	0.973684	0.973684	0.910569	0.894231	0.78284	9	ColShuf	FastFS	HsaMirGeneDB	RF
55	2	55	2	0.982143	0.979167	0.982143	0.982143	0.973451	0.971429	0.942529	0	pseudo	FastFS	HsaMirGeneDB	RF
49	7	49	7	0.924528	0.918367	0.924528	0.924528	0.899083	0.895238	0.790343	1	pseudo	FastFS	HsaMirGeneDB	RF
58	3	58	3	0.976744	0.983051	0.976744	0.976744	0.966667	0.961538	0.921242	2	pseudo	FastFS	HsaMirGeneDB	RF
49	5	49	5	0.941176	0.942308	0.941176	0.941176	0.924528	0.92381	0.847661	3	pseudo	FastFS	HsaMirGeneDB	RF
55	5	55	5	0.948276	0.931818	0.948276	0.948276	0.932203	0.923077	0.843373	4	pseudo	FastFS	HsaMirGeneDB	RF
59	6	59	6	0.925	0.951613	0.925	0.925	0.929134	0.914286	0.820853	5	pseudo	FastFS	HsaMirGeneDB	RF
57	1	57	1	1	1	1	1	0.991304	0.990476	0.98078	6	pseudo	FastFS	HsaMirGeneDB	RF
49	4	49	4	0.942308	0.941176	0.942308	0.942308	0.933333	0.932692	0.865385	7	pseudo	FastFS	HsaMirGeneDB	RF
62	5	62	5	0.947368	0.96875	0.947368	0.947368	0.946565	0.933333	0.858081	8	pseudo	FastFS	HsaMirGeneDB	RF
56	9	56	9	0.923077	0.949153	0.923077	0.923077	0.903226	0.884615	0.761194	9	pseudo	FastFS	HsaMirGeneDB	RF
54	0	54	0	1	1	1	1	1	1	1	0	RowShuf	LowVarFS	HsaMirGeneDB	RF
57	0	57	0	1	1	1	1	1	1	1	1	RowShuf	LowVarFS	HsaMirGeneDB	RF
53	0	53	0	1	1	1	1	1	1	1	2	RowShuf	LowVarFS	HsaMirGeneDB	RF
53	0	53	0	1	1	1	1	1	1	1	3	RowShuf	LowVarFS	HsaMirGeneDB	RF
52	0	52	0	1	1	1	1	1	1	1	4	RowShuf	LowVarFS	HsaMirGeneDB	RF
55	0	55	0	1	1	1	1	1	1	1	5	RowShuf	LowVarFS	HsaMirGeneDB	RF
53	0	53	0	1	1	1	1	1	1	1	6	RowShuf	LowVarFS	HsaMirGeneDB	RF
57	0	57	0	1	1	1	1	1	1	1	7	RowShuf	LowVarFS	HsaMirGeneDB	RF
60	0	60	0	1	1	1	1	1	1	1	8	RowShuf	LowVarFS	HsaMirGeneDB	RF
59	0	59	0	1	1	1	1	1	1	1	9	RowShuf	LowVarFS	HsaMirGeneDB	RF
45	26	45	26	0.789474	0.647059	0.789474	0.789474	0.703125	0.638095	0.253648	0	ColShuf	LowVarFS	HsaMirGeneDB	RF
38	30	38	30	0.791667	0.72973	0.791667	0.791667	0.655172	0.619048	0.2569	1	ColShuf	LowVarFS	HsaMirGeneDB	RF
36	24	36	24	0.72	0.681818	0.72	0.72	0.654545	0.634615	0.273529	2	ColShuf	LowVarFS	HsaMirGeneDB	RF
44	17	44	17	0.758621	0.721311	0.758621	0.758621	0.739496	0.704762	0.399336	3	ColShuf	LowVarFS	HsaMirGeneDB	RF
39	34	39	34	0.8125	0.709677	0.8125	0.8125	0.644628	0.586538	0.197991	4	ColShuf	LowVarFS	HsaMirGeneDB	RF
42	20	42	20	0.763636	0.697674	0.763636	0.763636	0.717949	0.685714	0.365965	5	ColShuf	LowVarFS	HsaMirGeneDB	RF
48	19	48	19	0.774194	0.716418	0.774194	0.774194	0.744186	0.685714	0.338362	6	ColShuf	LowVarFS	HsaMirGeneDB	RF
40	30	40	30	0.784314	0.676471	0.784314	0.784314	0.661157	0.605769	0.216752	7	ColShuf	LowVarFS	HsaMirGeneDB	RF
43	24	43	24	0.796296	0.710526	0.796296	0.796296	0.710744	0.666667	0.328031	8	ColShuf	LowVarFS	HsaMirGeneDB	RF
32	32	32	32	0.675	0.711111	0.675	0.675	0.587156	0.567308	0.160689	9	ColShuf	LowVarFS	HsaMirGeneDB	RF
53	2	53	2	0.98	0.981481	0.98	0.98	0.972477	0.971429	0.942779	0	pseudo	LowVarFS	HsaMirGeneDB	RF
57	2	57	2	0.982759	0.978261	0.982759	0.982759	0.974359	0.971429	0.942106	1	pseudo	LowVarFS	HsaMirGeneDB	RF
51	3	51	3	0.962264	0.96	0.962264	0.962264	0.953271	0.951923	0.903775	2	pseudo	LowVarFS	HsaMirGeneDB	RF
59	5	59	5	0.983333	0.97561	0.983333	0.983333	0.951613	0.942857	0.882022	3	pseudo	LowVarFS	HsaMirGeneDB	RF
54	4	54	4	0.981818	0.978261	0.981818	0.981818	0.955752	0.951923	0.903202	4	pseudo	LowVarFS	HsaMirGeneDB	RF
66	2	66	2	0.970588	0.970588	0.970588	0.970588	0.970588	0.961905	0.916534	5	pseudo	LowVarFS	HsaMirGeneDB	RF
60	2	60	2	0.967742	0.967742	0.967742	0.967742	0.967742	0.961905	0.92123	6	pseudo	LowVarFS	HsaMirGeneDB	RF
50	4	50	4	0.98	0.980392	0.98	0.98	0.952381	0.951923	0.903917	7	pseudo	LowVarFS	HsaMirGeneDB	RF
53	7	53	7	0.955556	0.963636	0.955556	0.955556	0.921739	0.914286	0.827397	8	pseudo	LowVarFS	HsaMirGeneDB	RF
53	4	53	4	1	1	1	1	0.963636	0.961538	0.922934	9	pseudo	LowVarFS	HsaMirGeneDB	RF
43	0	43	0	1	1	1	1	1	1	1	0	RowShuf	SlowFS	MmuMirGeneDB	RF
40	0	40	0	1	1	1	1	1	1	1	1	RowShuf	SlowFS	MmuMirGeneDB	RF
45	0	45	0	1	1	1	1	1	1	1	2	RowShuf	SlowFS	MmuMirGeneDB	RF
44	0	44	0	1	1	1	1	1	1	1	3	RowShuf	SlowFS	MmuMirGeneDB	RF
53	0	53	0	1	1	1	1	1	1	1	4	RowShuf	SlowFS	MmuMirGeneDB	RF
41	0	41	0	1	1	1	1	1	1	1	5	RowShuf	SlowFS	MmuMirGeneDB	RF
41	0	41	0	1	1	1	1	1	1	1	6	RowShuf	SlowFS	MmuMirGeneDB	RF
41	0	41	0	1	1	1	1	1	1	1	7	RowShuf	SlowFS	MmuMirGeneDB	RF
40	0	40	0	1	1	1	1	1	1	1	8	RowShuf	SlowFS	MmuMirGeneDB	RF
47	0	47	0	1	1	1	1	1	1	1	9	RowShuf	SlowFS	MmuMirGeneDB	RF
43	9	43	9	0.977273	0.962963	0.977273	0.977273	0.895833	0.873418	0.737367	0	ColShuf	SlowFS	MmuMirGeneDB	RF
44	6	44	6	0.977778	0.965517	0.977778	0.977778	0.926316	0.911392	0.815973	1	ColShuf	SlowFS	MmuMirGeneDB	RF
34	11	34	11	0.971429	0.970588	0.971429	0.971429	0.85	0.848101	0.700946	2	ColShuf	SlowFS	MmuMirGeneDB	RF
39	3	39	3	0.975	0.972973	0.975	0.975	0.95122	0.949367	0.898653	3	ColShuf	SlowFS	MmuMirGeneDB	RF
38	7	38	7	0.974359	0.970588	0.974359	0.974359	0.904762	0.898734	0.797825	4	ColShuf	SlowFS	MmuMirGeneDB	RF
39	5	39	5	0.928571	0.914286	0.928571	0.928571	0.906977	0.898734	0.795997	5	ColShuf	SlowFS	MmuMirGeneDB	RF
39	3	39	3	0.972973	0.975	0.972973	0.972973	0.95122	0.949367	0.898653	6	ColShuf	SlowFS	MmuMirGeneDB	RF
43	8	43	8	0.977273	0.964286	0.977273	0.977273	0.905263	0.886076	0.764335	7	ColShuf	SlowFS	MmuMirGeneDB	RF
38	5	38	5	0.944444	0.95	0.944444	0.944444	0.915663	0.911392	0.822586	8	ColShuf	SlowFS	MmuMirGeneDB	RF
37	9	37	9	0.878788	0.902439	0.878788	0.878788	0.850575	0.835443	0.668817	9	ColShuf	SlowFS	MmuMirGeneDB	RF
43	2	43	2	1	1	1	1	0.977273	0.974684	0.948735	0	pseudo	SlowFS	MmuMirGeneDB	RF
42	2	42	2	0.976744	0.971429	0.976744	0.976744	0.965517	0.962025	0.923276	1	pseudo	SlowFS	MmuMirGeneDB	RF
42	1	42	1	1	1	1	1	0.988235	0.987342	0.974541	2	pseudo	SlowFS	MmuMirGeneDB	RF
41	1	41	1	0.97619	0.97619	0.97619	0.97619	0.97619	0.974684	0.949163	3	pseudo	SlowFS	MmuMirGeneDB	RF
40	1	40	1	1	1	1	1	0.987654	0.987342	0.974671	4	pseudo	SlowFS	MmuMirGeneDB	RF
43	4	43	4	1	1	1	1	0.955556	0.949367	0.897001	5	pseudo	SlowFS	MmuMirGeneDB	RF
42	1	42	1	0.976744	0.976744	0.976744	0.976744	0.976744	0.974684	0.948966	6	pseudo	SlowFS	MmuMirGeneDB	RF
45	1	45	1	0.978261	0.978261	0.978261	0.978261	0.978261	0.974684	0.947958	7	pseudo	SlowFS	MmuMirGeneDB	RF
45	2	45	2	0.96875	0.978261	0.96875	0.96875	0.967742	0.962025	0.921601	8	pseudo	SlowFS	MmuMirGeneDB	RF
38	4	38	4	0.972973	0.974359	0.972973	0.972973	0.938272	0.936709	0.873519	9	pseudo	SlowFS	MmuMirGeneDB	RF
44	0	44	0	1	1	1	1	1	1	1	0	RowShuf	FastFS	MmuMirGeneDB	RF
43	0	43	0	1	1	1	1	1	1	1	1	RowShuf	FastFS	MmuMirGeneDB	RF
46	0	46	0	1	1	1	1	1	1	1	2	RowShuf	FastFS	MmuMirGeneDB	RF
46	0	46	0	1	1	1	1	1	1	1	3	RowShuf	FastFS	MmuMirGeneDB	RF
49	0	49	0	1	1	1	1	1	1	1	4	RowShuf	FastFS	MmuMirGeneDB	RF
43	0	43	0	1	1	1	1	1	1	1	5	RowShuf	FastFS	MmuMirGeneDB	RF
45	0	45	0	1	1	1	1	1	1	1	6	RowShuf	FastFS	MmuMirGeneDB	RF
42	0	42	0	1	1	1	1	1	1	1	7	RowShuf	FastFS	MmuMirGeneDB	RF
40	0	40	0	1	1	1	1	1	1	1	8	RowShuf	FastFS	MmuMirGeneDB	RF
42	0	42	0	1	1	1	1	1	1	1	9	RowShuf	FastFS	MmuMirGeneDB	RF
38	10	38	10	0.904762	0.870968	0.904762	0.904762	0.844444	0.822785	0.640676	0	ColShuf	FastFS	MmuMirGeneDB	RF
40	4	40	4	1	1	1	1	0.952381	0.949367	0.898588	1	ColShuf	FastFS	MmuMirGeneDB	RF
36	7	36	7	0.947368	0.944444	0.947368	0.947368	0.888889	0.886076	0.772916	2	ColShuf	FastFS	MmuMirGeneDB	RF
34	7	34	7	0.842105	0.85	0.842105	0.842105	0.839506	0.835443	0.670728	3	ColShuf	FastFS	MmuMirGeneDB	RF
39	7	39	7	0.975	0.969697	0.975	0.975	0.906977	0.898734	0.797046	4	ColShuf	FastFS	MmuMirGeneDB	RF
32	12	32	12	0.888889	0.885714	0.888889	0.888889	0.8	0.797468	0.598985	5	ColShuf	FastFS	MmuMirGeneDB	RF
41	8	41	8	0.931818	0.9	0.931818	0.931818	0.88172	0.860759	0.713674	6	ColShuf	FastFS	MmuMirGeneDB	RF
37	7	37	7	0.973684	0.971429	0.973684	0.973684	0.902439	0.898734	0.798341	7	ColShuf	FastFS	MmuMirGeneDB	RF
37	13	37	13	1	1	1	1	0.850575	0.835443	0.676332	8	ColShuf	FastFS	MmuMirGeneDB	RF
36	10	36	10	0.923077	0.909091	0.923077	0.923077	0.847059	0.835443	0.67157	9	ColShuf	FastFS	MmuMirGeneDB	RF
37	4	37	4	0.947368	0.948718	0.947368	0.947368	0.925	0.924051	0.848174	0	pseudo	FastFS	MmuMirGeneDB	RF
43	3	43	3	0.969697	0.977273	0.969697	0.969697	0.955556	0.949367	0.896799	1	pseudo	FastFS	MmuMirGeneDB	RF
38	5	38	5	1	1	1	1	0.938272	0.936709	0.873842	2	pseudo	FastFS	MmuMirGeneDB	RF
41	4	41	4	0.953488	0.941176	0.953488	0.953488	0.931818	0.924051	0.846204	3	pseudo	FastFS	MmuMirGeneDB	RF
45	5	45	5	1	1	1	1	0.947368	0.936709	0.868552	4	pseudo	FastFS	MmuMirGeneDB	RF
38	7	38	7	1	1	1	1	0.915663	0.911392	0.823717	5	pseudo	FastFS	MmuMirGeneDB	RF
37	4	37	4	0.948718	0.947368	0.948718	0.948718	0.925	0.924051	0.848174	6	pseudo	FastFS	MmuMirGeneDB	RF
39	2	39	2	0.973684	0.975	0.973684	0.973684	0.962963	0.962025	0.924014	7	pseudo	FastFS	MmuMirGeneDB	RF
40	4	40	4	0.909091	0.909091	0.909091	0.909091	0.909091	0.898734	0.794805	8	pseudo	FastFS	MmuMirGeneDB	RF
37	5	37	5	0.902439	0.891892	0.902439	0.902439	0.891566	0.886076	0.771603	9	pseudo	FastFS	MmuMirGeneDB	RF
42	0	42	0	1	1	1	1	1	1	1	0	RowShuf	LowVarFS	MmuMirGeneDB	RF
41	0	41	0	1	1	1	1	1	1	1	1	RowShuf	LowVarFS	MmuMirGeneDB	RF
45	0	45	0	1	1	1	1	1	1	1	2	RowShuf	LowVarFS	MmuMirGeneDB	RF
42	0	42	0	1	1	1	1	1	1	1	3	RowShuf	LowVarFS	MmuMirGeneDB	RF
48	0	48	0	1	1	1	1	1	1	1	4	RowShuf	LowVarFS	MmuMirGeneDB	RF
40	0	40	0	1	1	1	1	1	1	1	5	RowShuf	LowVarFS	MmuMirGeneDB	RF
42	0	42	0	1	1	1	1	1	1	1	6	RowShuf	LowVarFS	MmuMirGeneDB	RF
45	0	45	0	1	1	1	1	1	1	1	7	RowShuf	LowVarFS	MmuMirGeneDB	RF
40	0	40	0	1	1	1	1	1	1	1	8	RowShuf	LowVarFS	MmuMirGeneDB	RF
40	0	40	0	1	1	1	1	1	1	1	9	RowShuf	LowVarFS	MmuMirGeneDB	RF
30	24	30	24	0.810811	0.72	0.810811	0.810811	0.659341	0.607595	0.23301	0	ColShuf	LowVarFS	MmuMirGeneDB	RF
32	28	32	28	0.842105	0.684211	0.842105	0.842105	0.653061	0.56962	0.155877	1	ColShuf	LowVarFS	MmuMirGeneDB	RF
29	21	29	21	0.644444	0.58	0.644444	0.644444	0.610526	0.531646	0.0272879	2	ColShuf	LowVarFS	MmuMirGeneDB	RF
28	23	28	23	0.756757	0.678571	0.756757	0.756757	0.636364	0.594937	0.204531	3	ColShuf	LowVarFS	MmuMirGeneDB	RF
37	13	37	13	0.770833	0.74	0.770833	0.770833	0.755102	0.696203	0.35554	4	ColShuf	LowVarFS	MmuMirGeneDB	RF
27	26	27	26	0.675	0.509434	0.675	0.675	0.580645	0.506329	0.0083682	5	ColShuf	LowVarFS	MmuMirGeneDB	RF
29	28	29	28	0.783784	0.636364	0.783784	0.783784	0.617021	0.544304	0.113466	6	ColShuf	LowVarFS	MmuMirGeneDB	RF
26	21	26	21	0.764706	0.75	0.764706	0.764706	0.641975	0.632911	0.284733	7	ColShuf	LowVarFS	MmuMirGeneDB	RF
23	25	23	25	0.575	0.479167	0.575	0.575	0.522727	0.468354	-0.0661954	8	ColShuf	LowVarFS	MmuMirGeneDB	RF
30	20	30	20	0.769231	0.689655	0.769231	0.769231	0.674157	0.632911	0.268285	9	ColShuf	LowVarFS	MmuMirGeneDB	RF
41	4	41	4	0.97619	0.970588	0.97619	0.97619	0.942529	0.936709	0.872292	0	pseudo	LowVarFS	MmuMirGeneDB	RF
37	3	37	3	0.948718	0.948718	0.948718	0.948718	0.936709	0.936709	0.873438	1	pseudo	LowVarFS	MmuMirGeneDB	RF
44	3	44	3	0.9375	0.956522	0.9375	0.9375	0.946237	0.936709	0.869335	2	pseudo	LowVarFS	MmuMirGeneDB	RF
42	4	42	4	0.976744	0.969697	0.976744	0.976744	0.94382	0.936709	0.871545	3	pseudo	LowVarFS	MmuMirGeneDB	RF
37	3	37	3	0.948718	0.948718	0.948718	0.948718	0.936709	0.936709	0.873438	4	pseudo	LowVarFS	MmuMirGeneDB	RF
39	4	39	4	0.928571	0.916667	0.928571	0.928571	0.917647	0.911392	0.821785	5	pseudo	LowVarFS	MmuMirGeneDB	RF
39	5	39	5	0.928571	0.914286	0.928571	0.928571	0.906977	0.898734	0.795997	6	pseudo	LowVarFS	MmuMirGeneDB	RF
38	4	38	4	0.95	0.945946	0.95	0.95	0.926829	0.924051	0.847979	7	pseudo	LowVarFS	MmuMirGeneDB	RF
39	6	39	6	0.970588	0.975	0.970588	0.970588	0.917647	0.911392	0.822472	8	pseudo	LowVarFS	MmuMirGeneDB	RF
42	4	42	4	1	1	1	1	0.954545	0.949367	0.897668	9	pseudo	LowVarFS	MmuMirGeneDB	RF
24	0	24	0	1	1	1	1	1	1	1	0	RowShuf	SlowFS	GgaMirGeneDB	RF
26	0	26	0	1	1	1	1	1	1	1	1	RowShuf	SlowFS	GgaMirGeneDB	RF
24	0	24	0	1	1	1	1	1	1	1	2	RowShuf	SlowFS	GgaMirGeneDB	RF
24	0	24	0	1	1	1	1	1	1	1	3	RowShuf	SlowFS	GgaMirGeneDB	RF
29	0	29	0	1	1	1	1	1	1	1	4	RowShuf	SlowFS	GgaMirGeneDB	RF
25	0	25	0	1	1	1	1	1	1	1	5	RowShuf	SlowFS	GgaMirGeneDB	RF
27	0	27	0	1	1	1	1	1	1	1	6	RowShuf	SlowFS	GgaMirGeneDB	RF
26	0	26	0	1	1	1	1	1	1	1	7	RowShuf	SlowFS	GgaMirGeneDB	RF
25	0	25	0	1	1	1	1	1	1	1	8	RowShuf	SlowFS	GgaMirGeneDB	RF
26	0	26	0	1	1	1	1	1	1	1	9	RowShuf	SlowFS	GgaMirGeneDB	RF
21	6	21	6	0.954545	0.947368	0.954545	0.954545	0.857143	0.847826	0.697936	0	ColShuf	SlowFS	GgaMirGeneDB	RF
24	9	24	9	0.923077	0.846154	0.923077	0.923077	0.813559	0.76087	0.492986	1	ColShuf	SlowFS	GgaMirGeneDB	RF
23	3	23	3	0.958333	0.95	0.958333	0.958333	0.92	0.913043	0.825095	2	ColShuf	SlowFS	GgaMirGeneDB	RF
22	5	22	5	0.916667	0.894737	0.916667	0.916667	0.862745	0.847826	0.693333	3	ColShuf	SlowFS	GgaMirGeneDB	RF
25	6	25	6	0.862069	0.806452	0.862069	0.862069	0.833333	0.777778	0.501109	4	ColShuf	SlowFS	GgaMirGeneDB	RF
22	4	22	4	0.88	0.85	0.88	0.88	0.862745	0.847826	0.692161	5	ColShuf	SlowFS	GgaMirGeneDB	RF
19	10	19	10	1	1	1	1	0.791667	0.782609	0.584087	6	ColShuf	SlowFS	GgaMirGeneDB	RF
20	6	20	6	0.95	0.952381	0.95	0.95	0.851064	0.847826	0.699065	7	ColShuf	SlowFS	GgaMirGeneDB	RF
21	4	21	4	0.904762	0.913043	0.904762	0.904762	0.875	0.869565	0.73913	8	ColShuf	SlowFS	GgaMirGeneDB	RF
20	6	20	6	1	1	1	1	0.869565	0.866667	0.737864	9	ColShuf	SlowFS	GgaMirGeneDB	RF
27	2	27	2	0.941176	0.964286	0.941176	0.941176	0.947368	0.934783	0.861723	0	pseudo	SlowFS	GgaMirGeneDB	RF
24	0	24	0	1	1	1	1	1	1	1	1	pseudo	SlowFS	GgaMirGeneDB	RF
31	1	31	1	1	1	1	1	0.984127	0.978261	0.949672	2	pseudo	SlowFS	GgaMirGeneDB	RF
29	0	29	0	1	1	1	1	1	1	1	3	pseudo	SlowFS	GgaMirGeneDB	RF
28	0	28	0	1	1	1	1	1	1	1	4	pseudo	SlowFS	GgaMirGeneDB	RF
26	1	26	1	1	1	1	1	0.981132	0.978261	0.955513	5	pseudo	SlowFS	GgaMirGeneDB	RF
24	1	24	1	1	1	1	1	0.979592	0.978261	0.956357	6	pseudo	SlowFS	GgaMirGeneDB	RF
27	1	27	1	1	1	1	1	0.981818	0.978261	0.954813	7	pseudo	SlowFS	GgaMirGeneDB	RF
28	1	28	1	1	1	1	1	0.982456	0.978261	0.953908	8	pseudo	SlowFS	GgaMirGeneDB	RF
25	1	25	1	1	1	1	1	0.980392	0.977778	0.954774	9	pseudo	SlowFS	GgaMirGeneDB	RF
24	0	24	0	1	1	1	1	1	1	1	0	RowShuf	FastFS	GgaMirGeneDB	RF
29	0	29	0	1	1	1	1	1	1	1	1	RowShuf	FastFS	GgaMirGeneDB	RF
25	0	25	0	1	1	1	1	1	1	1	2	RowShuf	FastFS	GgaMirGeneDB	RF
26	0	26	0	1	1	1	1	1	1	1	3	RowShuf	FastFS	GgaMirGeneDB	RF
25	0	25	0	1	1	1	1	1	1	1	4	RowShuf	FastFS	GgaMirGeneDB	RF
25	0	25	0	1	1	1	1	1	1	1	5	RowShuf	FastFS	GgaMirGeneDB	RF
25	0	25	0	1	1	1	1	1	1	1	6	RowShuf	FastFS	GgaMirGeneDB	RF
24	0	24	0	1	1	1	1	1	1	1	7	RowShuf	FastFS	GgaMirGeneDB	RF
29	0	29	0	1	1	1	1	1	1	1	8	RowShuf	FastFS	GgaMirGeneDB	RF
25	0	25	0	1	1	1	1	1	1	1	9	RowShuf	FastFS	GgaMirGeneDB	RF
21	7	21	7	0.954545	0.944444	0.954545	0.954545	0.84	0.826087	0.655431	0	ColShuf	FastFS	GgaMirGeneDB	RF
21	6	21	6	0.913043	0.894737	0.913043	0.913043	0.84	0.826087	0.652174	1	ColShuf	FastFS	GgaMirGeneDB	RF
28	4	28	4	0.903226	0.875	0.903226	0.903226	0.888889	0.847826	0.647702	2	ColShuf	FastFS	GgaMirGeneDB	RF
23	4	23	4	0.851852	0.851852	0.851852	0.851852	0.851852	0.826087	0.641326	3	ColShuf	FastFS	GgaMirGeneDB	RF
17	15	17	15	0.944444	0.923077	0.944444	0.944444	0.68	0.644444	0.344262	4	ColShuf	FastFS	GgaMirGeneDB	RF
24	3	24	3	1	1	1	1	0.941176	0.934783	0.868571	5	ColShuf	FastFS	GgaMirGeneDB	RF
23	4	23	4	0.851852	0.884615	0.851852	0.851852	0.867925	0.847826	0.688588	6	ColShuf	FastFS	GgaMirGeneDB	RF
22	3	22	3	0.904762	0.916667	0.904762	0.904762	0.897959	0.891304	0.781784	7	ColShuf	FastFS	GgaMirGeneDB	RF
20	6	20	6	0.869565	0.85	0.869565	0.869565	0.816327	0.804348	0.608696	8	ColShuf	FastFS	GgaMirGeneDB	RF
17	11	17	11	0.882353	0.894737	0.882353	0.882353	0.723404	0.711111	0.443387	9	ColShuf	FastFS	GgaMirGeneDB	RF
23	1	23	1	1	1	1	1	0.978723	0.978261	0.956522	0	pseudo	FastFS	GgaMirGeneDB	RF
22	3	22	3	0.956522	0.952381	0.956522	0.956522	0.916667	0.913043	0.826087	1	pseudo	FastFS	GgaMirGeneDB	RF
25	0	25	0	1	1	1	1	1	1	1	2	pseudo	FastFS	GgaMirGeneDB	RF
24	1	24	1	1	1	1	1	0.979592	0.978261	0.956357	3	pseudo	FastFS	GgaMirGeneDB	RF
25	1	25	1	0.961538	0.961538	0.961538	0.961538	0.961538	0.955556	0.908907	4	pseudo	FastFS	GgaMirGeneDB	RF
23	5	23	5	0.92	0.888889	0.92	0.92	0.867925	0.847826	0.689788	5	pseudo	FastFS	GgaMirGeneDB	RF
26	0	26	0	1	1	1	1	1	1	1	6	pseudo	FastFS	GgaMirGeneDB	RF
26	2	26	2	1	1	1	1	0.962963	0.956522	0.910506	7	pseudo	FastFS	GgaMirGeneDB	RF
24	2	24	2	0.923077	0.923077	0.923077	0.923077	0.923077	0.913043	0.823077	8	pseudo	FastFS	GgaMirGeneDB	RF
25	4	25	4	0.9375	0.961538	0.9375	0.9375	0.909091	0.888889	0.767322	9	pseudo	FastFS	GgaMirGeneDB	RF
24	0	24	0	1	1	1	1	1	1	1	0	RowShuf	LowVarFS	GgaMirGeneDB	RF
23	0	23	0	1	1	1	1	1	1	1	1	RowShuf	LowVarFS	GgaMirGeneDB	RF
24	0	24	0	1	1	1	1	1	1	1	2	RowShuf	LowVarFS	GgaMirGeneDB	RF
29	0	29	0	1	1	1	1	1	1	1	3	RowShuf	LowVarFS	GgaMirGeneDB	RF
24	0	24	0	1	1	1	1	1	1	1	4	RowShuf	LowVarFS	GgaMirGeneDB	RF
27	0	27	0	1	1	1	1	1	1	1	5	RowShuf	LowVarFS	GgaMirGeneDB	RF
24	0	24	0	1	1	1	1	1	1	1	6	RowShuf	LowVarFS	GgaMirGeneDB	RF
24	0	24	0	1	1	1	1	1	1	1	7	RowShuf	LowVarFS	GgaMirGeneDB	RF
26	0	26	0	1	1	1	1	1	1	1	8	RowShuf	LowVarFS	GgaMirGeneDB	RF
24	0	24	0	1	1	1	1	1	1	1	9	RowShuf	LowVarFS	GgaMirGeneDB	RF
17	16	17	16	0.772727	0.615385	0.772727	0.772727	0.618182	0.543478	0.103896	0	ColShuf	LowVarFS	GgaMirGeneDB	RF
17	14	17	14	0.73913	0.6	0.73913	0.73913	0.62963	0.565217	0.130435	1	ColShuf	LowVarFS	GgaMirGeneDB	RF
19	13	19	13	0.791667	0.642857	0.791667	0.791667	0.678571	0.608696	0.203846	2	ColShuf	LowVarFS	GgaMirGeneDB	RF
15	14	15	14	0.882353	0.882353	0.882353	0.882353	0.652174	0.652174	0.348673	3	ColShuf	LowVarFS	GgaMirGeneDB	RF
11	14	11	14	0.52381	0.5	0.52381	0.52381	0.478261	0.466667	-0.0588235	4	ColShuf	LowVarFS	GgaMirGeneDB	RF
16	11	16	11	0.592593	0.64	0.592593	0.592593	0.615385	0.565217	0.117083	5	ColShuf	LowVarFS	GgaMirGeneDB	RF
15	9	15	9	0.625	0.625	0.625	0.625	0.625	0.608696	0.215909	6	ColShuf	LowVarFS	GgaMirGeneDB	RF
18	12	18	12	0.75	0.625	0.75	0.75	0.666667	0.608696	0.206897	7	ColShuf	LowVarFS	GgaMirGeneDB	RF
19	11	19	11	0.730769	0.633333	0.730769	0.730769	0.678571	0.608696	0.185039	8	ColShuf	LowVarFS	GgaMirGeneDB	RF
13	17	13	17	0.619048	0.466667	0.619048	0.619048	0.509804	0.444444	-0.0869565	9	ColShuf	LowVarFS	GgaMirGeneDB	RF
23	2	23	2	0.958333	0.952381	0.958333	0.958333	0.938776	0.934783	0.86907	0	pseudo	LowVarFS	GgaMirGeneDB	RF
25	3	25	3	0.944444	0.961538	0.944444	0.944444	0.925926	0.913043	0.821012	1	pseudo	LowVarFS	GgaMirGeneDB	RF
22	2	22	2	1	1	1	1	0.956522	0.956522	0.913208	2	pseudo	LowVarFS	GgaMirGeneDB	RF
24	1	24	1	0.96	0.96	0.96	0.96	0.96	0.956522	0.912381	3	pseudo	LowVarFS	GgaMirGeneDB	RF
27	2	27	2	0.931034	0.931034	0.931034	0.931034	0.931034	0.911111	0.806034	4	pseudo	LowVarFS	GgaMirGeneDB	RF
24	1	24	1	0.96	0.96	0.96	0.96	0.96	0.956522	0.912381	5	pseudo	LowVarFS	GgaMirGeneDB	RF
24	1	24	1	1	1	1	1	0.979592	0.978261	0.956357	6	pseudo	LowVarFS	GgaMirGeneDB	RF
26	2	26	2	0.944444	0.962963	0.944444	0.944444	0.945455	0.934783	0.86444	7	pseudo	LowVarFS	GgaMirGeneDB	RF
22	2	22	2	0.954545	0.956522	0.954545	0.954545	0.93617	0.934783	0.869565	8	pseudo	LowVarFS	GgaMirGeneDB	RF
24	2	24	2	1	1	1	1	0.96	0.955556	0.91018	9	pseudo	LowVarFS	GgaMirGeneDB	RF
30	0	30	0	1	1	1	1	1	1	1	0	RowShuf	SlowFS	DreMirGeneDB	RF
34	0	34	0	1	1	1	1	1	1	1	1	RowShuf	SlowFS	DreMirGeneDB	RF
32	0	32	0	1	1	1	1	1	1	1	2	RowShuf	SlowFS	DreMirGeneDB	RF
30	0	30	0	1	1	1	1	1	1	1	3	RowShuf	SlowFS	DreMirGeneDB	RF
35	0	35	0	1	1	1	1	1	1	1	4	RowShuf	SlowFS	DreMirGeneDB	RF
30	0	30	0	1	1	1	1	1	1	1	5	RowShuf	SlowFS	DreMirGeneDB	RF
33	0	33	0	1	1	1	1	1	1	1	6	RowShuf	SlowFS	DreMirGeneDB	RF
30	0	30	0	1	1	1	1	1	1	1	7	RowShuf	SlowFS	DreMirGeneDB	RF
36	0	36	0	1	1	1	1	1	1	1	8	RowShuf	SlowFS	DreMirGeneDB	RF
29	0	29	0	1	1	1	1	1	1	1	9	RowShuf	SlowFS	DreMirGeneDB	RF
28	9	28	9	1	1	1	1	0.861538	0.844828	0.69258	0	ColShuf	SlowFS	DreMirGeneDB	RF
32	6	32	6	0.941176	0.894737	0.941176	0.941176	0.888889	0.859649	0.7	1	ColShuf	SlowFS	DreMirGeneDB	RF
25	7	25	7	0.961538	0.961538	0.961538	0.961538	0.862069	0.862069	0.727059	2	ColShuf	SlowFS	DreMirGeneDB	RF
28	7	28	7	0.933333	0.909091	0.933333	0.933333	0.861538	0.842105	0.680374	3	ColShuf	SlowFS	DreMirGeneDB	RF
34	5	34	5	0.971429	0.944444	0.971429	0.971429	0.918919	0.894737	0.770161	4	ColShuf	SlowFS	DreMirGeneDB	RF
28	6	28	6	0.933333	0.916667	0.933333	0.933333	0.875	0.862069	0.722488	5	ColShuf	SlowFS	DreMirGeneDB	RF
27	6	27	6	0.833333	0.870968	0.833333	0.833333	0.84375	0.824561	0.644195	6	ColShuf	SlowFS	DreMirGeneDB	RF
27	11	27	11	0.9	0.85	0.9	0.9	0.794118	0.758621	0.512019	7	ColShuf	SlowFS	DreMirGeneDB	RF
28	8	28	8	1	1	1	1	0.875	0.859649	0.720588	8	ColShuf	SlowFS	DreMirGeneDB	RF
27	5	27	5	0.931034	0.92	0.931034	0.931034	0.885246	0.877193	0.753856	9	ColShuf	SlowFS	DreMirGeneDB	RF
32	1	32	1	1	1	1	1	0.984615	0.982759	0.965018	0	pseudo	SlowFS	DreMirGeneDB	RF
36	2	36	2	0.972973	0.947368	0.972973	0.972973	0.96	0.947368	0.883117	1	pseudo	SlowFS	DreMirGeneDB	RF
33	2	33	2	0.970588	0.956522	0.970588	0.970588	0.956522	0.948276	0.892725	2	pseudo	SlowFS	DreMirGeneDB	RF
29	2	29	2	0.966667	0.961538	0.966667	0.966667	0.95082	0.947368	0.894249	3	pseudo	SlowFS	DreMirGeneDB	RF
33	2	33	2	1	1	1	1	0.970588	0.964912	0.927203	4	pseudo	SlowFS	DreMirGeneDB	RF
29	1	29	1	0.966667	0.966667	0.966667	0.966667	0.966667	0.965517	0.930952	5	pseudo	SlowFS	DreMirGeneDB	RF
33	0	33	0	1	1	1	1	1	1	1	6	pseudo	SlowFS	DreMirGeneDB	RF
33	0	33	0	1	1	1	1	1	1	1	7	pseudo	SlowFS	DreMirGeneDB	RF
32	1	32	1	1	1	1	1	0.984615	0.982456	0.964218	8	pseudo	SlowFS	DreMirGeneDB	RF
37	1	37	1	1	1	1	1	0.986667	0.982456	0.961039	9	pseudo	SlowFS	DreMirGeneDB	RF
31	0	31	0	1	1	1	1	1	1	1	0	RowShuf	FastFS	DreMirGeneDB	RF
31	0	31	0	1	1	1	1	1	1	1	1	RowShuf	FastFS	DreMirGeneDB	RF
37	0	37	0	1	1	1	1	1	1	1	2	RowShuf	FastFS	DreMirGeneDB	RF
32	0	32	0	1	1	1	1	1	1	1	3	RowShuf	FastFS	DreMirGeneDB	RF
32	0	32	0	1	1	1	1	1	1	1	4	RowShuf	FastFS	DreMirGeneDB	RF
30	0	30	0	1	1	1	1	1	1	1	5	RowShuf	FastFS	DreMirGeneDB	RF
33	0	33	0	1	1	1	1	1	1	1	6	RowShuf	FastFS	DreMirGeneDB	RF
35	0	35	0	1	1	1	1	1	1	1	7	RowShuf	FastFS	DreMirGeneDB	RF
32	0	32	0	1	1	1	1	1	1	1	8	RowShuf	FastFS	DreMirGeneDB	RF
29	0	29	0	1	1	1	1	1	1	1	9	RowShuf	FastFS	DreMirGeneDB	RF
30	10	30	10	0.857143	0.75	0.857143	0.857143	0.8	0.741379	0.43871	0	ColShuf	FastFS	DreMirGeneDB	RF
26	10	26	10	0.928571	0.904762	0.928571	0.928571	0.8125	0.789474	0.580882	1	ColShuf	FastFS	DreMirGeneDB	RF
27	10	27	10	0.964286	0.952381	0.964286	0.964286	0.830769	0.810345	0.624264	2	ColShuf	FastFS	DreMirGeneDB	RF
20	14	20	14	0.8	0.782609	0.8	0.8	0.677966	0.666667	0.348767	3	ColShuf	FastFS	DreMirGeneDB	RF
27	5	27	5	0.931034	0.92	0.931034	0.931034	0.885246	0.877193	0.753856	4	ColShuf	FastFS	DreMirGeneDB	RF
26	5	26	5	0.962963	0.962963	0.962963	0.962963	0.896552	0.896552	0.794083	5	ColShuf	FastFS	DreMirGeneDB	RF
28	10	28	10	0.903226	0.842105	0.903226	0.903226	0.811594	0.77193	0.53012	6	ColShuf	FastFS	DreMirGeneDB	RF
26	12	26	12	0.896552	0.85	0.896552	0.896552	0.776119	0.741379	0.482759	7	ColShuf	FastFS	DreMirGeneDB	RF
26	10	26	10	0.896552	0.857143	0.896552	0.896552	0.8	0.77193	0.541744	8	ColShuf	FastFS	DreMirGeneDB	RF
24	10	24	10	0.923077	0.913043	0.923077	0.923077	0.8	0.789474	0.585956	9	ColShuf	FastFS	DreMirGeneDB	RF
27	4	27	4	1	1	1	1	0.931034	0.931034	0.862722	0	pseudo	FastFS	DreMirGeneDB	RF
28	1	28	1	0.965517	0.965517	0.965517	0.965517	0.965517	0.964912	0.929803	1	pseudo	FastFS	DreMirGeneDB	RF
28	3	28	3	0.965517	0.962963	0.965517	0.965517	0.933333	0.931034	0.862069	2	pseudo	FastFS	DreMirGeneDB	RF
30	4	30	4	0.956522	0.967742	0.956522	0.956522	0.923077	0.912281	0.82154	3	pseudo	FastFS	DreMirGeneDB	RF
27	3	27	3	0.964286	0.962963	0.964286	0.964286	0.931034	0.929825	0.859779	4	pseudo	FastFS	DreMirGeneDB	RF
30	1	30	1	0.967742	0.967742	0.967742	0.967742	0.967742	0.965517	0.930705	5	pseudo	FastFS	DreMirGeneDB	RF
28	2	28	2	0.962963	0.965517	0.962963	0.962963	0.949153	0.947368	0.89464	6	pseudo	FastFS	DreMirGeneDB	RF
30	3	30	3	1	1	1	1	0.952381	0.948276	0.896057	7	pseudo	FastFS	DreMirGeneDB	RF
29	1	29	1	1	1	1	1	0.983051	0.982456	0.96488	8	pseudo	FastFS	DreMirGeneDB	RF
28	2	28	2	1	1	1	1	0.965517	0.964912	0.929889	9	pseudo	FastFS	DreMirGeneDB	RF
35	0	35	0	1	1	1	1	1	1	1	0	RowShuf	LowVarFS	DreMirGeneDB	RF
34	0	34	0	1	1	1	1	1	1	1	1	RowShuf	LowVarFS	DreMirGeneDB	RF
35	0	35	0	1	1	1	1	1	1	1	2	RowShuf	LowVarFS	DreMirGeneDB	RF
29	0	29	0	1	1	1	1	1	1	1	3	RowShuf	LowVarFS	DreMirGeneDB	RF
32	0	32	0	1	1	1	1	1	1	1	4	RowShuf	LowVarFS	DreMirGeneDB	RF
31	0	31	0	1	1	1	1	1	1	1	5	RowShuf	LowVarFS	DreMirGeneDB	RF
34	0	34	0	1	1	1	1	1	1	1	6	RowShuf	LowVarFS	DreMirGeneDB	RF
29	0	29	0	1	1	1	1	1	1	1	7	RowShuf	LowVarFS	DreMirGeneDB	RF
30	0	30	0	1	1	1	1	1	1	1	8	RowShuf	LowVarFS	DreMirGeneDB	RF
41	0	41	0	1	1	1	1	1	1	1	9	RowShuf	LowVarFS	DreMirGeneDB	RF
21	14	21	14	0.6	0.617647	0.6	0.6	0.608696	0.534483	0.0345253	0	ColShuf	LowVarFS	DreMirGeneDB	RF
21	13	21	13	0.617647	0.636364	0.617647	0.617647	0.626866	0.561404	0.0952381	1	ColShuf	LowVarFS	DreMirGeneDB	RF
22	14	22	14	0.628571	0.611111	0.628571	0.628571	0.619718	0.534483	0.020025	2	ColShuf	LowVarFS	DreMirGeneDB	RF
21	20	21	20	0.724138	0.512195	0.724138	0.724138	0.6	0.508772	0.00992556	3	ColShuf	LowVarFS	DreMirGeneDB	RF
21	22	21	22	0.84	0.714286	0.84	0.84	0.617647	0.54386	0.141367	4	ColShuf	LowVarFS	DreMirGeneDB	RF
24	16	24	16	0.774194	0.611111	0.774194	0.774194	0.676056	0.603448	0.185592	5	ColShuf	LowVarFS	DreMirGeneDB	RF
16	18	16	18	0.652174	0.666667	0.652174	0.652174	0.551724	0.54386	0.114695	6	ColShuf	LowVarFS	DreMirGeneDB	RF
24	21	24	21	0.827586	0.615385	0.827586	0.827586	0.648649	0.551724	0.103448	7	ColShuf	LowVarFS	DreMirGeneDB	RF
16	14	16	14	0.533333	0.551724	0.533333	0.533333	0.542373	0.526316	0.051756	8	ColShuf	LowVarFS	DreMirGeneDB	RF
12	29	12	29	0.625	0.666667	0.625	0.625	0.40678	0.385965	-0.0572337	9	ColShuf	LowVarFS	DreMirGeneDB	RF
30	2	30	2	0.967742	0.961538	0.967742	0.967742	0.952381	0.948276	0.895808	0	pseudo	LowVarFS	DreMirGeneDB	RF
31	1	31	1	0.96875	0.96875	0.96875	0.96875	0.96875	0.964912	0.92875	1	pseudo	LowVarFS	DreMirGeneDB	RF
30	3	30	3	0.967742	0.96	0.967742	0.967742	0.9375	0.931034	0.860744	2	pseudo	LowVarFS	DreMirGeneDB	RF
32	0	32	0	1	1	1	1	1	1	1	3	pseudo	LowVarFS	DreMirGeneDB	RF
36	3	36	3	1	1	1	1	0.96	0.947368	0.883436	4	pseudo	LowVarFS	DreMirGeneDB	RF
32	2	32	2	1	1	1	1	0.969697	0.965517	0.929782	5	pseudo	LowVarFS	DreMirGeneDB	RF
31	2	31	2	1	1	1	1	0.96875	0.964912	0.928839	6	pseudo	LowVarFS	DreMirGeneDB	RF
36	3	36	3	1	1	1	1	0.96	0.948276	0.88716	7	pseudo	LowVarFS	DreMirGeneDB	RF
30	2	30	2	1	1	1	1	0.967742	0.964912	0.929368	8	pseudo	LowVarFS	DreMirGeneDB	RF
35	3	35	3	1	1	1	1	0.958904	0.947368	0.886076	9	pseudo	LowVarFS	DreMirGeneDB	RF
